# Supplementary material for: Design, synthesis, and evaluation of novel N'-substituted-1-(4-chlorobenzyl)-1H-indol-3-carbohydrazides as antitumor agents
Source: PubMed Central journal article supplement (PMC7534272; doi:10.1080/14756366.2020.1816997), 2020-09-28
Supplement: IENZ_A_1816997_SM6267.pdf [file IENZ_A_1816997_SM6267.pdf]

# SUPPLEMENTAL MATERIALS

for

## Design, Synthesis and Evaluation of Novel *N'*-substituted-1-(4-chlorobenzyl)-1*H*-indol-3-carbohydrazides as Antitumor Agents

Le Cong Huan,<sup>a,d</sup> Duong Tien Anh,<sup>a</sup> Pham-The Hai,<sup>a</sup> Lai Duc Anh,<sup>a</sup> Eun Jae Park,<sup>b</sup> A Young Ji,<sup>b</sup> Jong Soon Kang,<sup>c</sup> Do Thi Mai Dung,<sup>a</sup> Dao Thi Kim Oanh,<sup>a</sup> Truong Thanh Tung,<sup>e,f</sup> Dinh Thi Thanh Hai,<sup>\*,a</sup> Sang-Bae Han,<sup>\*,b</sup> Nguyen-Hai Nam<sup>\*,a</sup>

<sup>a</sup>Hanoi University of Pharmacy, 13-15 Le Thanh Tong, Hanoi, Vietnam

<sup>b</sup>College of Pharmacy, Chungbuk National University, 194-31, Osongsaengmyung-1, Heungdeok, Cheongju, Chungbuk, 28160, Republic of Korea

<sup>c</sup>Bio-Evaluation Center, Korea Research Institute of Bioscience and Biotechnology, Cheongju, Chungbuk, Republic of Korea

<sup>d</sup>Thai Binh University of Medicine and Pharmacy, Thai Binh City, Vietnam

<sup>e</sup>Faculty of Pharmacy, PHENIKAA University, Hanoi, 12116, Vietnam

<sup>f</sup>PHENIKAA Institute for Advanced Study (PIAS), PHENIKAA University, Hanoi, 12116, Vietnam

**Keywords:** Acylhydrazones, acetohydrazides, cytotoxicity, caspase activation.

**\*Corresponding authors:** Tel.: +84-4-39330531; Fax: +84-4-39332332; Emails: [shan@cbnu.ac.kr](mailto:shan@cbnu.ac.kr) (S.B. Han); [namnh@hup.edu.vn](mailto:namnh@hup.edu.vn) (N.H. Nam).

## ALL <sup>1</sup>H & <sup>13</sup>C NMR SPECTRA OF THE COMPOUNDS

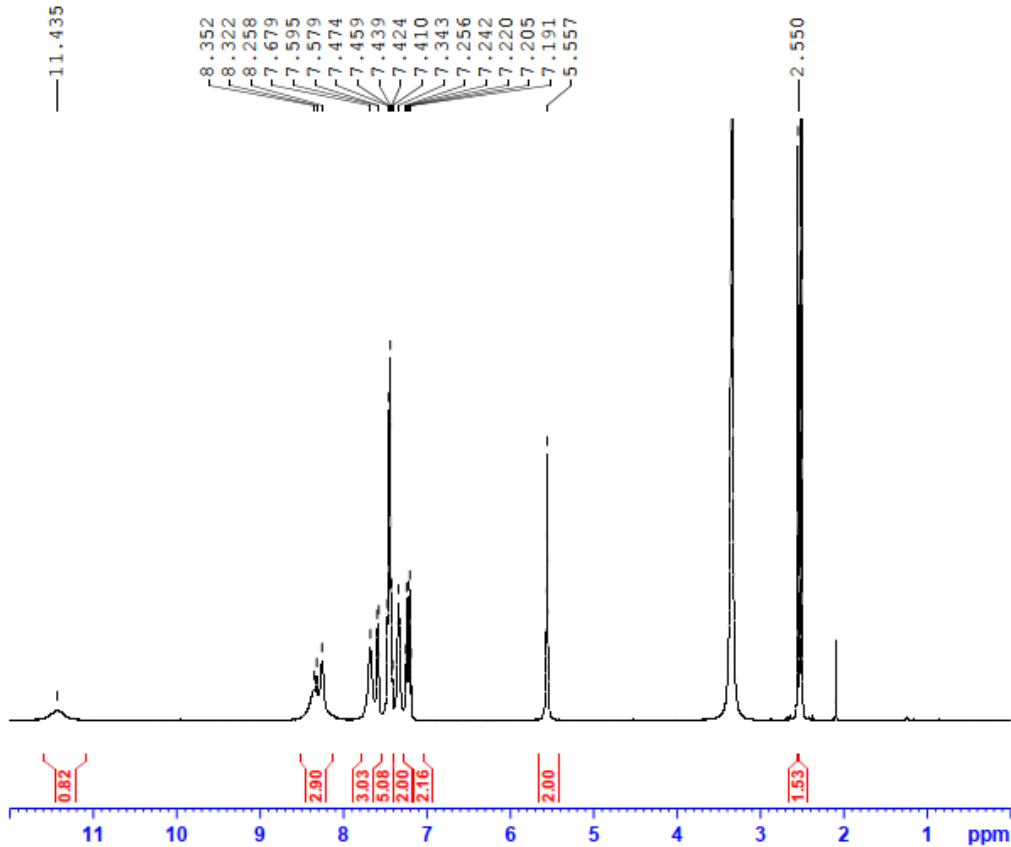

<sup>1</sup>H-NMR of compound 4a

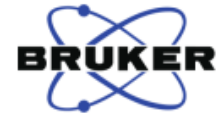

```

Current Data Parameters
NAME      TAnh-105A-2
EXPNO    10
PROCNO   1

FC - Acquisition Parameters
Date_    20191010
Time     13.27
INSTRUM  spect
PROBHD   5 mm PABBO BB/
PULPROG  zg30
TD       65536
SOLVENT  DMSO
NS       16
DS       2
SWH      10000.000 Hz
FIDRES   0.152588 Hz
AQ       3.278799 sec
RG       152.54
DM       50.000 usec
DE       6.50 usec
TE       298.9 K
D1       1.00000000 sec
TD0      1

===== CHANNEL f1 =====
SF01    500.1320885 MHz
NUC1     1H
P1       9.80 usec
PLW1    24.00000000 W

FC - Processing parameters
SI       65536
SF       500.1300000 MHz
WDW      EM
SSB      0
LB       0.30 Hz
GB       0
PC       1.00
  
```

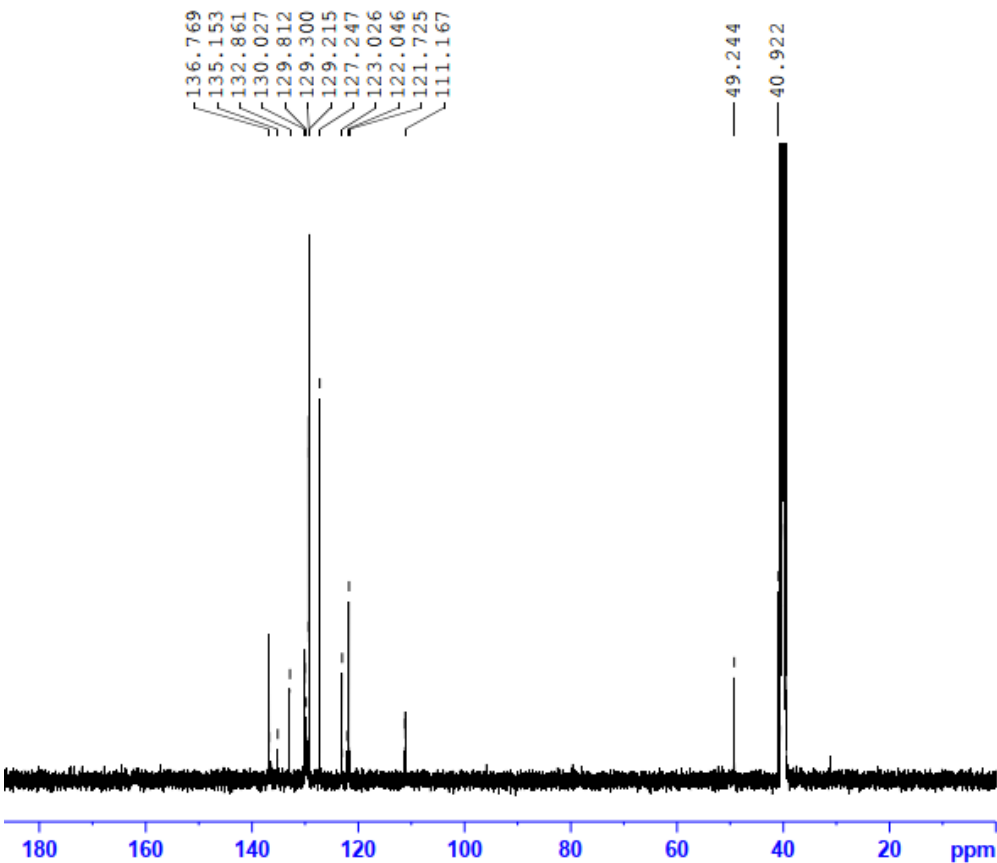

<sup>13</sup>C-NMR of compound 4a

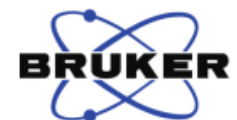

```

Current Data Parameters
NAME      TAnh-105A-2
EXPNO    11
PROCNO   1

FC - Acquisition Parameters
Date_    20191011
Time     10.54
INSTRUM  spect
PROBHD   5 mm PABBO BB/
PULPROG  zgpg30
TD       65536
SOLVENT  DMSO
NS       2048
DS       4
SWH      31250.000 Hz
FIDRES   0.476837 Hz
AQ       1.0485960 sec
RG       191.38
DM       16.000 usec
DE       6.50 usec
TE       299.7 K
D1       2.00000000 sec
D11      0.03000000 sec
TD0      1

===== CHANNEL f1 =====
SF01    125.7702627 MHz
NUC1     13C
P1       9.50 usec
PLW1    90.00000000 W

===== CHANNEL f2 =====
SF02    500.1320005 MHz
NUC2     1H
CPDPRG12 waltz16
PCPD2    80.00 usec
PLW2    24.00000000 W
PLW12   0.36015001 W
PLW13   0.23050000 W

FC - Processing parameters
SI       65536
SF       125.7877885 MHz
WDW      EM
SSB      0
TR       1.00 Hz
  
```

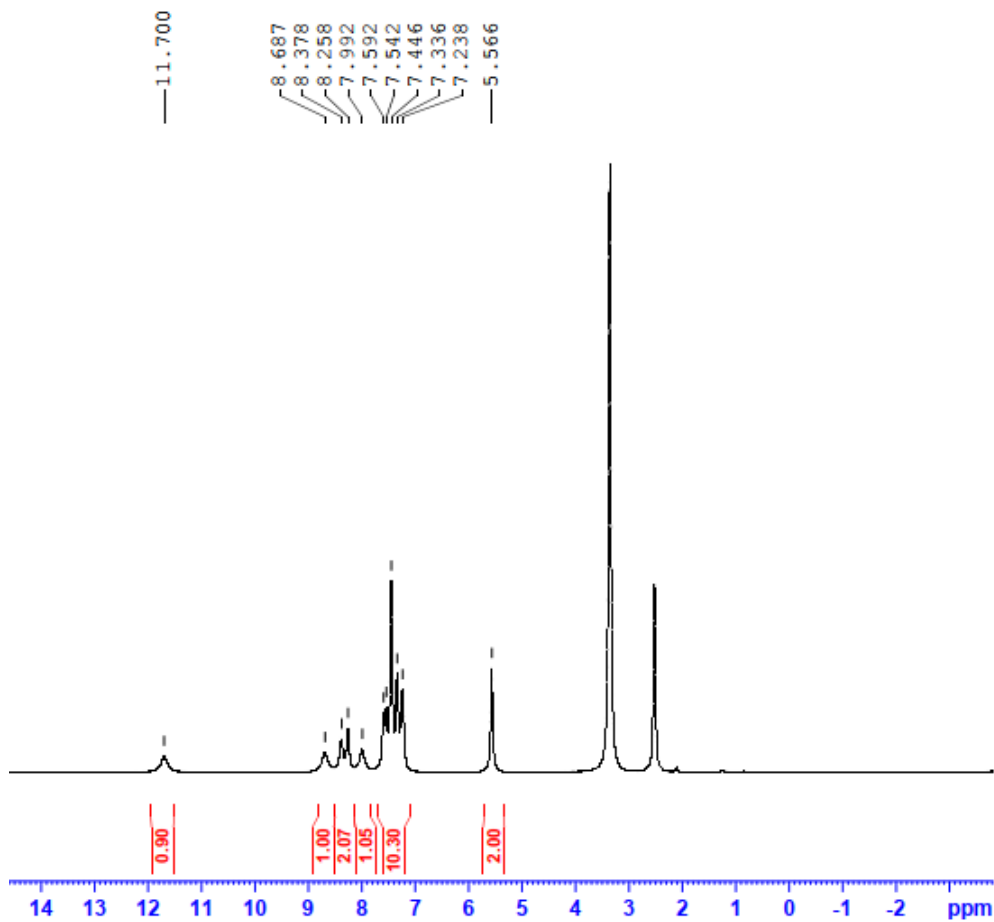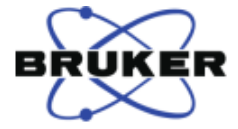

Current Data Parameters  
 NAME TAnh-105B  
 EXPNO 10  
 PROCNO 1

FC - Acquisition Parameters  
 Date\_ 20191015  
 Time 16.56  
 INSTRUM spect  
 PROBHD 5 mm PABBO BB/  
 PULPROG zg30  
 TD 65536  
 SOLVENT DMSO  
 NS 16  
 DS 2  
 SWH 10000.000 Hz  
 FIDRES 0.152588 Hz  
 AQ 3.2767999 sec  
 RG 138.87  
 DW 50.000 usec  
 DE 6.50 usec  
 TE 298.7 K  
 D1 1.00000000 sec  
 TDO 1

===== CHANNEL f1 =====  
 SFO1 500.1330885 MHz  
 NUC1 1H  
 P1 9.80 usec  
 PLW1 24.00000000 W

FC - Processing parameters  
 SI 65536  
 SF 500.1300000 MHz  
 WDW EM  
 SSB 0  
 LB 0.30 Hz  
 GB 0  
 PC 1.00

<sup>1</sup>H-NMR of compound 4b

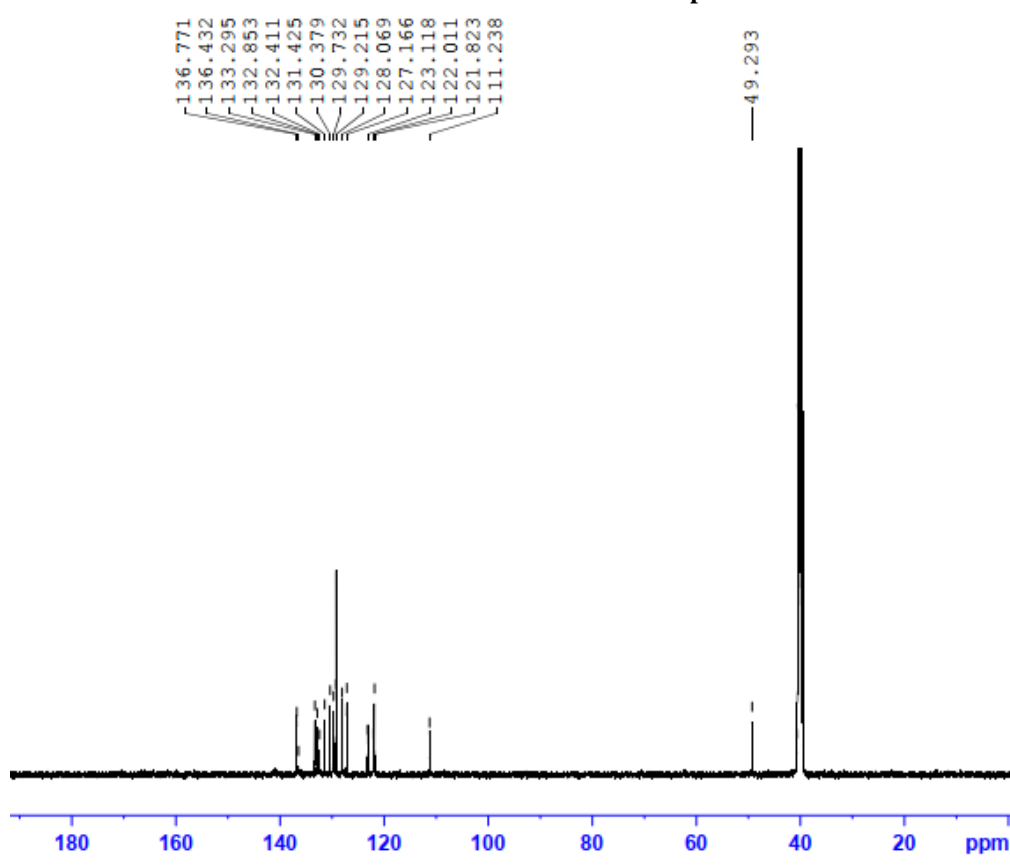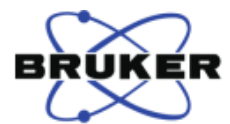

Current Data Parameters  
 NAME TAnh-105B  
 EXPNO 11  
 PROCNO 1

FC - Acquisition Parameters  
 Date\_ 20191015  
 Time 20.30  
 INSTRUM spect  
 PROBHD 5 mm PABBO BB/  
 PULPROG zg30  
 TD 65536  
 SOLVENT DMSO  
 NS 4096  
 DS 4  
 SWH 31250.000 Hz  
 FIDRES 0.476827 Hz  
 AQ 1.0485760 sec  
 RG 191.38  
 DW 16.000 usec  
 DE 6.50 usec  
 TE 299.8 K  
 D1 2.00000000 sec  
 D11 0.03000000 sec  
 TDO 1

===== CHANNEL f1 =====  
 SFO1 129.7703637 MHz  
 NUC1 13C  
 P1 9.50 usec  
 PLW1 90.00000000 W

===== CHANNEL f2 =====  
 SFO2 500.1320005 MHz  
 NUC2 1H  
 CPDPRG2 waltz16  
 PCPD2 80.00 usec  
 PLM2 24.00000000 W  
 PLM12 0.26015001 W  
 PLM13 0.23050000 W

FC - Processing parameters  
 SI 65536  
 SF 129.7577885 MHz  
 WDW EM  
 SSB 0  
 LB 1.00 Hz

<sup>13</sup>C-NMR of compound 4b

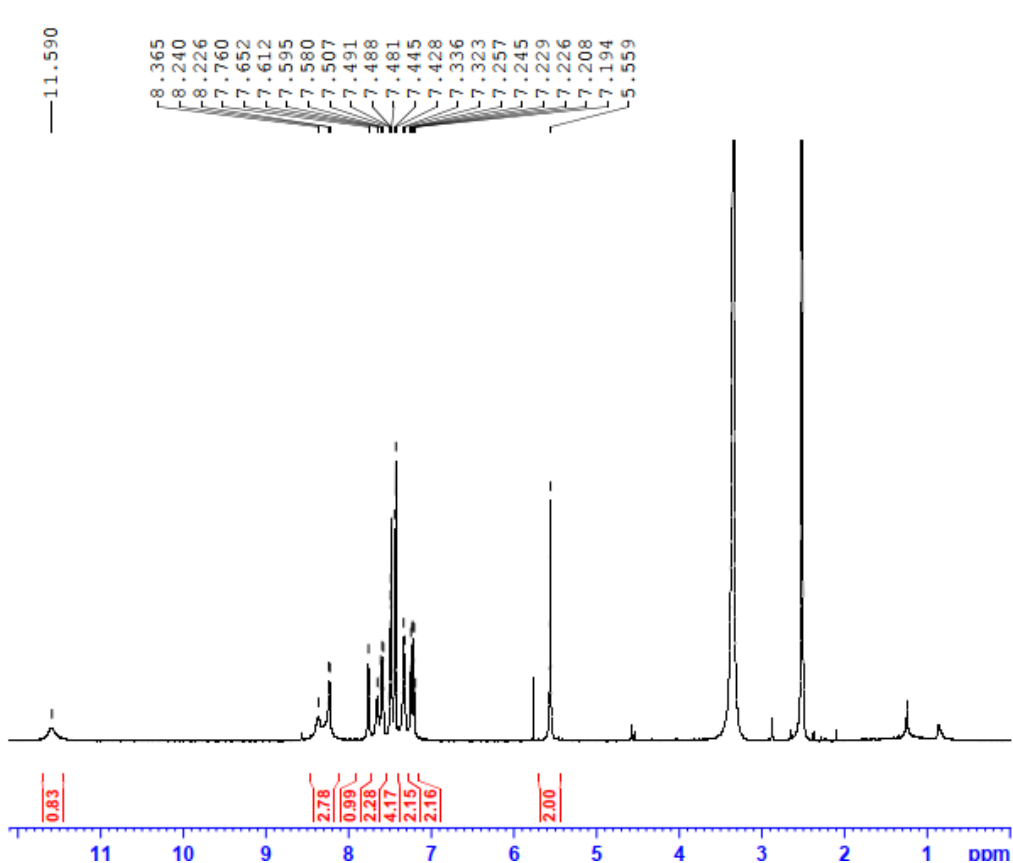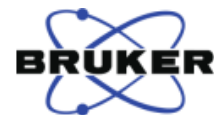

Current Data Parameters  
NAME TAnh-105C  
EXPNO 10  
PROCNO 1

FC - Acquisition Parameters  
Date\_ 20191125  
Time 0.49  
INSTRUM spect  
PROBHD 5 mm PABBO BB/  
PULPROG zg30  
TD 65536  
SOLVENT DMSO  
NS 16  
DS 2  
SWH 10000.000 Hz  
FIDRES 0.162888 Hz  
AQ 3.27679999 sec  
RG 191.38  
DN 50.000 usec  
DE 6.50 usec  
TE 299.8 K  
D1 1.00000000 sec  
TDO 1

===== CHANNEL #1 =====  
SF01 500.1330888 MHz  
NUC1 1H  
P1 9.80 usec  
PLW1 24.00000000 W

FC - Processing parameters  
SI 65536  
SF 500.1300000 MHz  
WDW EM  
SSB 0  
LB 0.30 Hz  
GB 0  
PC 1.00

<sup>1</sup>H-NMR of compound 4c

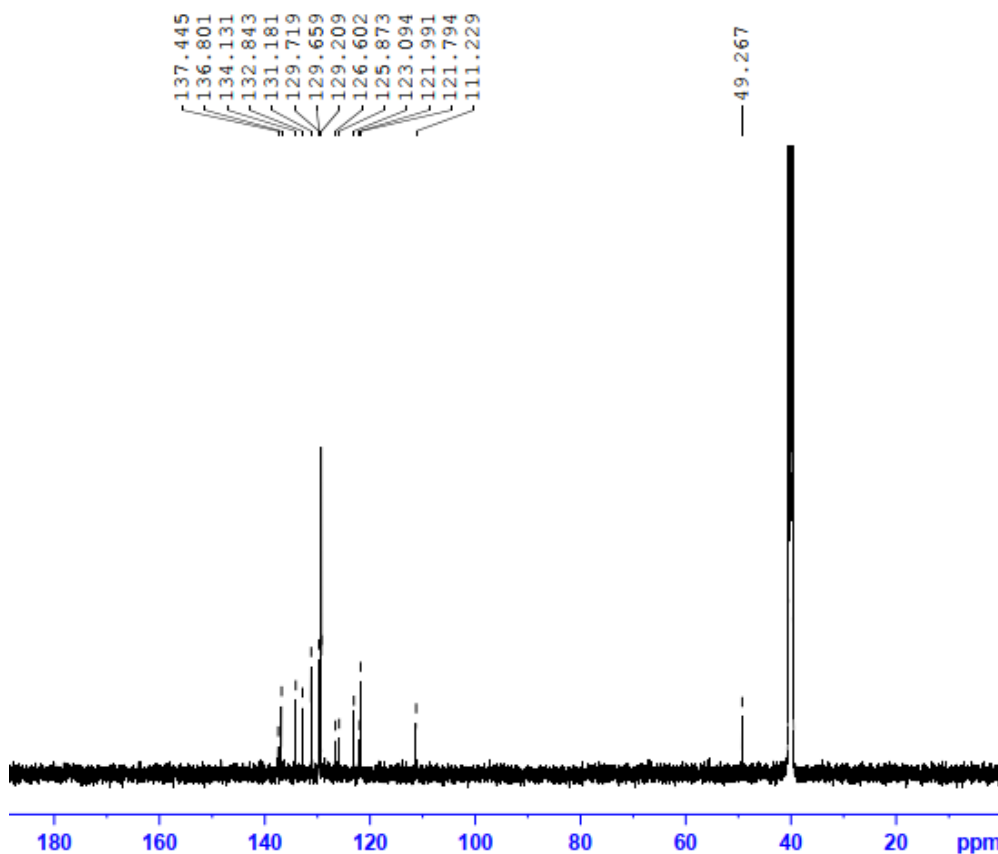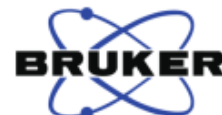

Current Data Parameters  
NAME TAnh-105C  
EXPNO 11  
PROCNO 1

FC - Acquisition Parameters  
Date\_ 20191125  
Time 4.23  
INSTRUM spect  
PROBHD 5 mm PABBO BB/  
PULPROG zgpg30  
TD 65536  
SOLVENT DMSO  
NS 4096  
DS 4  
SWH 31250.000 Hz  
FIDRES 0.476837 Hz  
AQ 1.04885760 sec  
RG 191.38  
DN 16.000 usec  
DE 6.50 usec  
TE 299.4 K  
D1 2.00000000 sec  
D11 0.03000000 sec  
TDO 1

===== CHANNEL #1 =====  
SF01 125.7703627 MHz  
NUC1 13C  
P1 9.50 usec  
PLW1 90.00000000 W

===== CHANNEL #2 =====  
SF02 500.1320005 MHz  
NUC2 1H  
CPDPRG12 waltz16  
PCPD2 80.00 usec  
PLW2 24.00000000 W  
PLW12 0.26015001 W  
PLW13 0.23050000 W

FC - Processing parameters  
SI 65536  
SF 125.7577885 MHz  
WDW EM  
SSB 0  
LB 1.00 Hz  
PC 1.00

<sup>13</sup>C-NMR of compound 4c

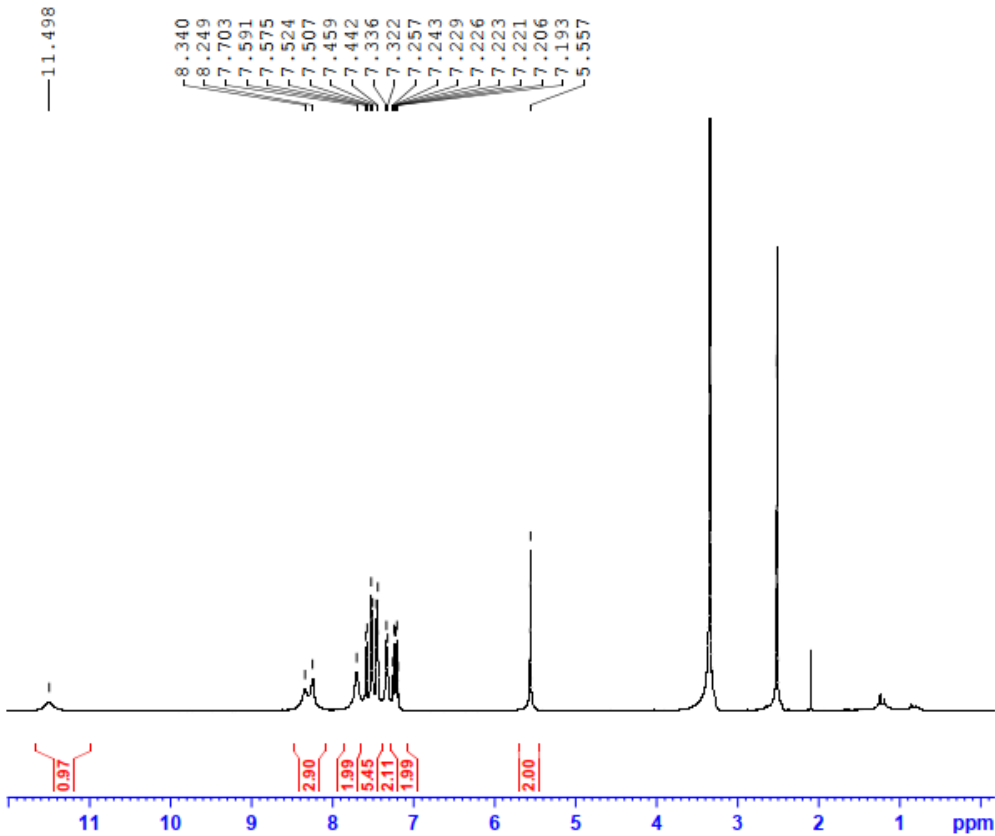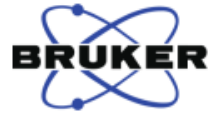

Current Data Parameters  
 NAME TANh-105D  
 EXPNO 20  
 PROCNO 1

F2 - Acquisition Parameters  
 Date\_ 20191018  
 Time\_ 20.34  
 INSTRUM spect  
 PROBHD 5 mm PABBO BB/  
 PULPROG zg30  
 TD 65536  
 SOLVENT DMSO  
 NS 16  
 DS 2  
 SWH 10000.000 Hz  
 FIDRES 0.152388 Hz  
 AQ 3.2767999 sec  
 RG 191.38  
 DW 30.000 usec  
 DE 6.50 usec  
 TE 299.1 K  
 D1 1.00000000 sec  
 TDO 1

===== CHANNEL #1 =====  
 SFO1 500.1320885 MHz  
 NUC1 1H  
 P1 9.80 usec  
 PLW1 24.00000000 W

F2 - Processing parameters  
 SI 65536  
 SF 500.1300000 MHz  
 WDW EM  
 SSB 0  
 LB 0.30 Hz  
 GB 0  
 PC 1.00

<sup>1</sup>H-NMR of compound 4d

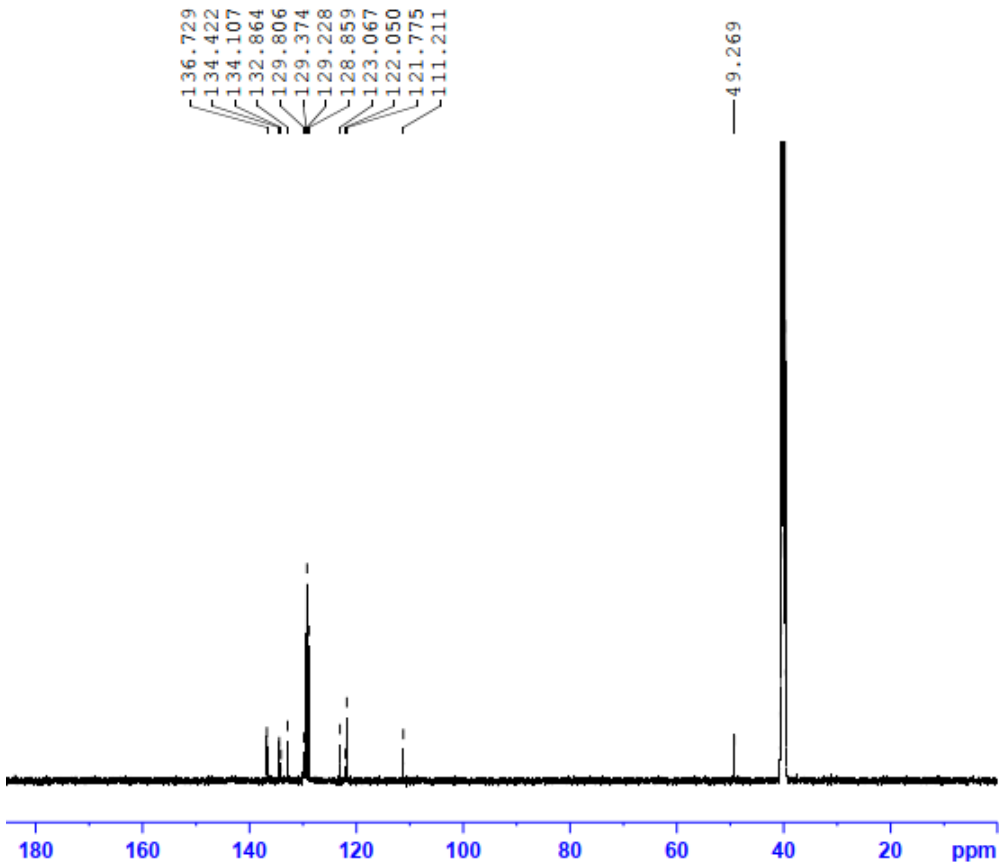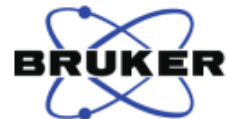

Current Data Parameters  
 NAME TANh-105D  
 EXPNO 21  
 PROCNO 1

F2 - Acquisition Parameters  
 Date\_ 20191016  
 Time\_ 0.07  
 INSTRUM spect  
 PROBHD 5 mm PABBO BB/  
 PULPROG zgpg30  
 TD 65536  
 SOLVENT DMSO  
 NS 4096  
 DS 4  
 SWH 31260.000 Hz  
 FIDRES 0.476837 Hz  
 AQ 1.0485760 sec  
 RG 191.38  
 DW 16.000 usec  
 DE 6.50 usec  
 TE 299.8 K  
 D1 2.00000000 sec  
 D11 0.03000000 sec  
 TDO 1

===== CHANNEL #1 =====  
 SFO1 125.7703637 MHz  
 NUC1 13C  
 P1 9.50 usec  
 PLW1 90.00000000 W

===== CHANNEL #2 =====  
 SFO2 500.1320005 MHz  
 NUC2 1H  
 CPDPRG12 waltz16  
 PCPD2 80.00 usec  
 PLW2 24.00000000 W  
 PLW3 0.26019001 W  
 PLW4 0.29050000 W

F2 - Processing parameters  
 SI 65536  
 SF 125.7577888 MHz  
 WDW EM  
 SSB 0  
 LB 1.00 Hz

<sup>13</sup>C-NMR of compound 4d

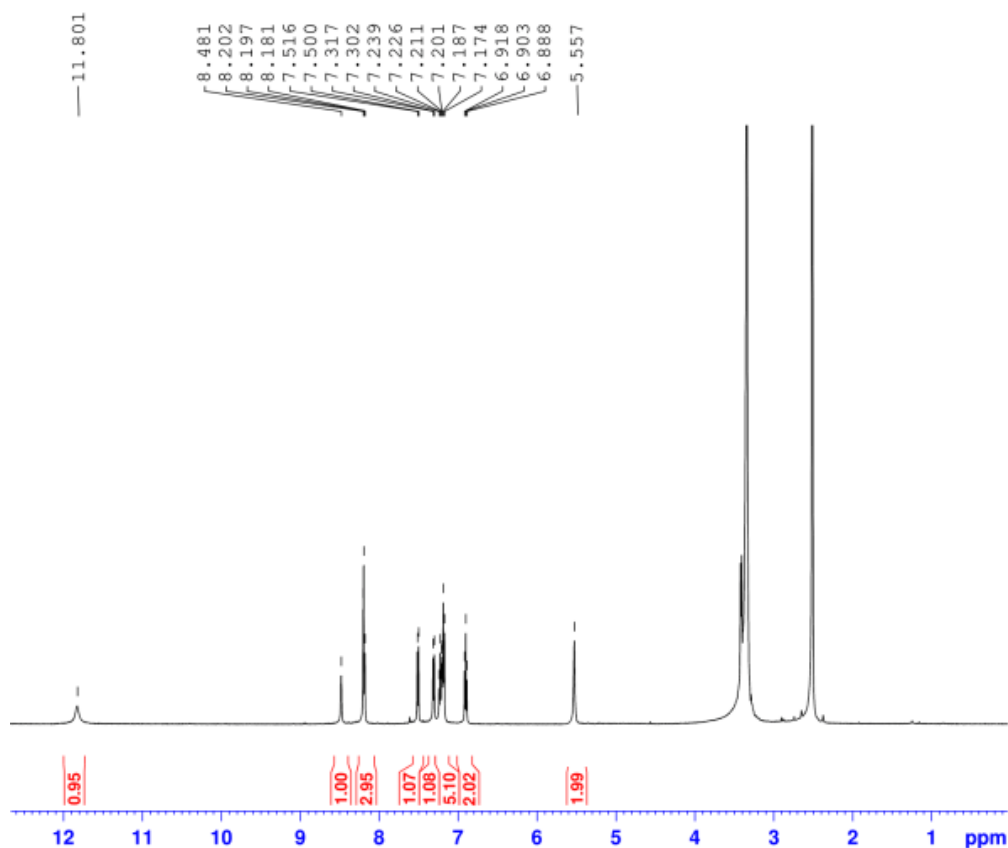

<sup>1</sup>H-NMR of compound 4e

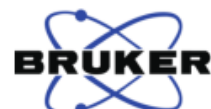

```

Current Data Parameters
NAME      Tanh-105E
EXPNO    10
PROCNO   1

F2 - Acquisition Parameters
Date_    20191116
Time     15.05
INSTRUM  spect
PROBHD   5 mm PABBO BB/
PULPROG  zg30
TD       65536
SOLVENT  DMSO
NS       16
DS       2
SWH      10000.000 Hz
FIDRES   0.152588 Hz
AQ       3.2767999 sec
RG       191.38
DW       50.000 usec
DE       6.50 usec
TE       298.8 K
D1       1.00000000 sec
TD0      1

----- CHANNEL f1 -----
SF01    500.1330885 MHz
NUC1     1H
P1       9.80 usec
PLW1    24.00000000 W

F2 - Processing parameters
SI       65536
SF       500.1300000 MHz
WDW      EM
SSB      0
LB       0.30 Hz
GB       0
PC       1.00
  
```

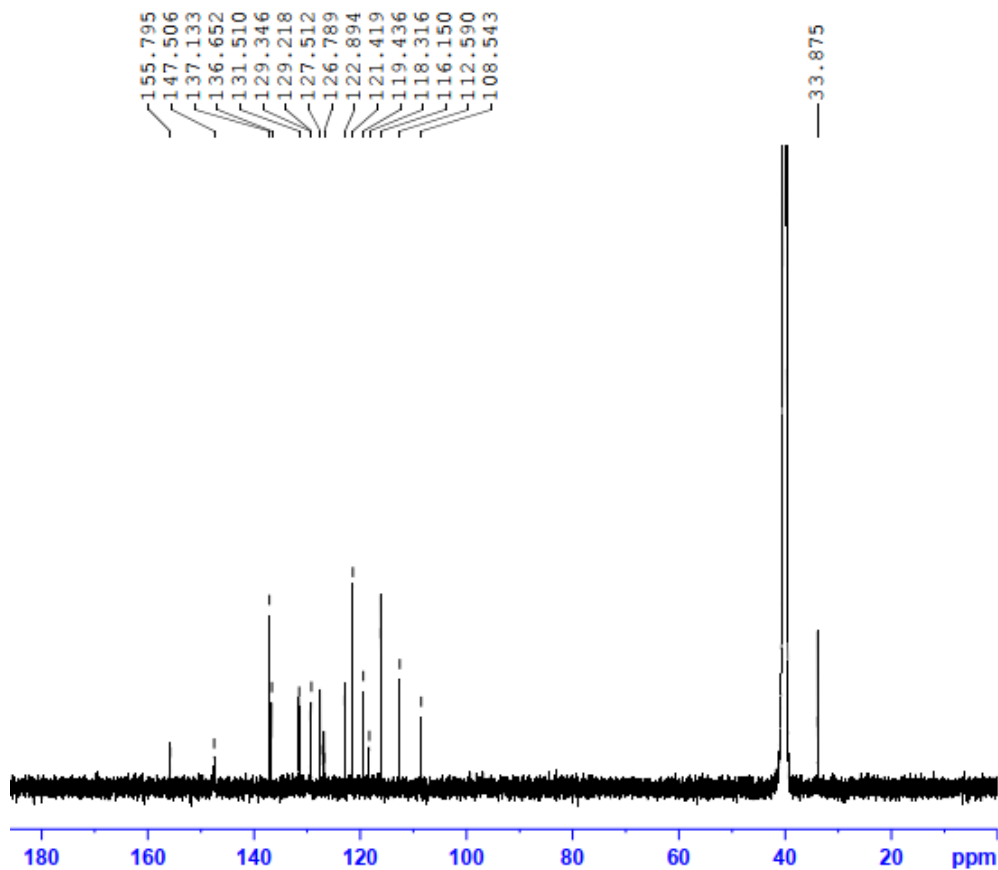

<sup>13</sup>C-NMR of compound 4e

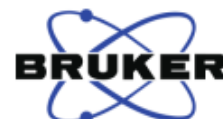

```

Current Data Parameters
NAME      Tanh-105E
EXPNO    11
PROCNO   1

F2 - Acquisition Parameters
Date_    20191116
Time     22.11
INSTRUM  spect
PROBHD   5 mm PABBO BB/
PULPROG  zgpg30
TD       65536
SOLVENT  DMSO
NS       8192
DS       4
SWH      31250.000 Hz
FIDRES   0.476827 Hz
AQ       1.0488760 sec
RG       191.38
DW       16.000 usec
DE       6.50 usec
TE       299.4 K
D1       2.00000000 sec
D11      0.03000000 sec
TD0      1

===== CHANNEL f1 =====
SF01    125.7703627 MHz
NUC1     13C
P1       9.50 usec
PLW1    90.00000000 W

===== CHANNEL f2 =====
SF02    500.1320005 MHz
NUC2     1H
CPDPRG12 waltz16
PCPD0    80.00 usec
PLW2    24.00000000 W
PLW12   0.36015001 W
PLW13   0.23060000 W

F2 - Processing parameters
SI       65536
SF       125.7577885 MHz
WDW      EM
SSB      0
LB       1.00 Hz
  
```

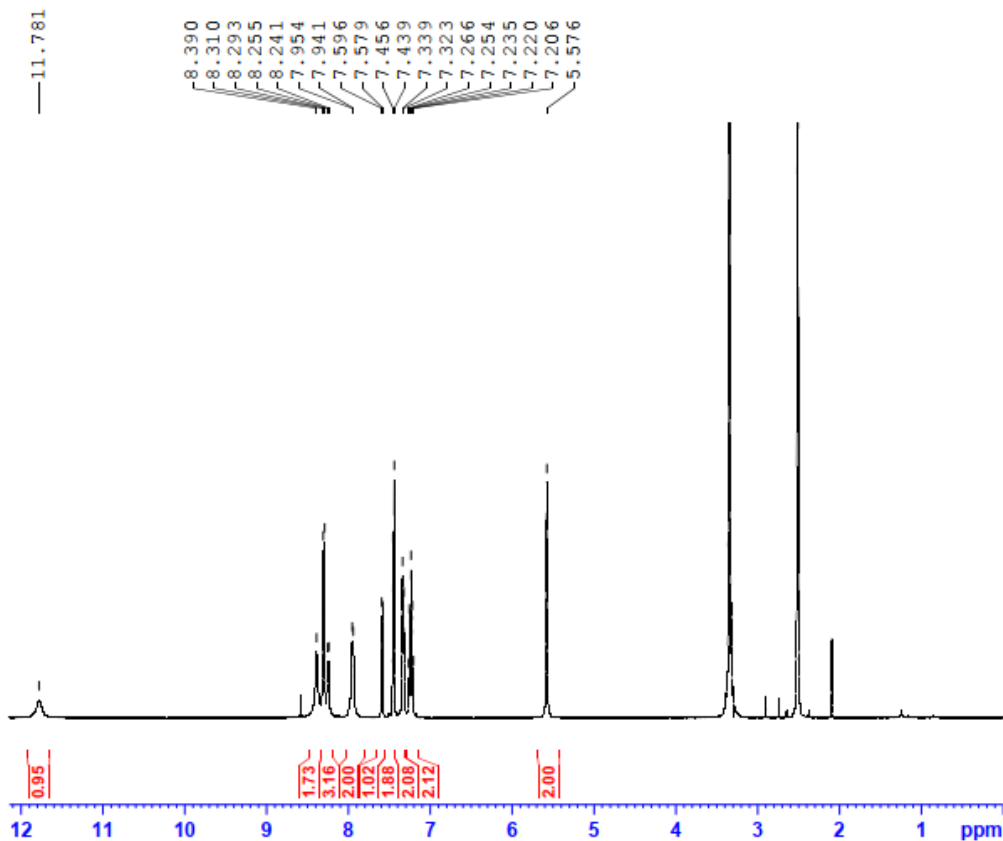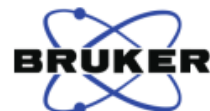

Current Data Parameters  
 NAME Tanh-105F  
 EXPNO 20  
 PROCNO 1

FC - Acquisition Parameters  
 Date\_ 20191108  
 Time 13.32  
 INSTRUM spect  
 PROBHD 5 mm PABBO BB/  
 PULPROG zg30  
 TD 65536  
 SOLVENT DMSO  
 NS 16  
 DS 2  
 SNH 10000.000 Hz  
 FIDRES 0.150588 Hz  
 AQ 3.2767999 sec  
 RG 191.38  
 DW 50.000 use  
 DE 6.50 use  
 TE 298.6 K  
 D1 1.00000000 sec  
 TDO 1

===== CHANNEL f1 =====  
 SF01 500.1330885 MHz  
 NUC1 1H  
 P1 9.50 use  
 PLW1 24.00000000 W

FC - Processing parameters  
 SI 65536  
 SF 500.1330000 MHz  
 WDW EM  
 SSB 0  
 LB 0.30 Hz  
 GB 0  
 PC 1.00

<sup>1</sup>H-NMR of compound 4f

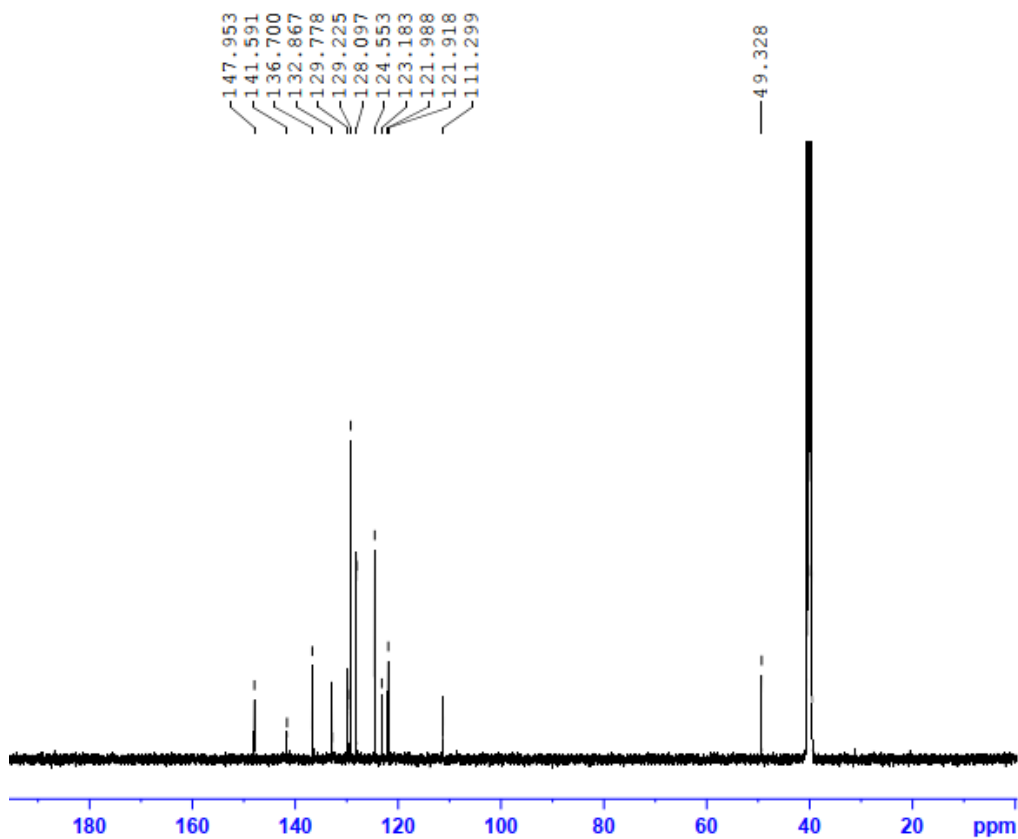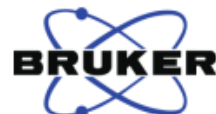

Current Data Parameters  
 NAME Tanh-105F  
 EXPNO 21  
 PROCNO 1

FC - Acquisition Parameters  
 Date\_ 20191109  
 Time 14.45  
 INSTRUM spect  
 PROBHD 5 mm PABBO BB/  
 PULPROG zgpg30  
 TD 65536  
 SOLVENT DMSO  
 NS 8192  
 DS 4  
 SNH 31250.000 Hz  
 FIDRES 0.476837 Hz  
 AQ 1.0488760 sec  
 RG 191.38  
 DW 16.000 use  
 DE 6.50 use  
 TE 298.6 K  
 D1 2.00000000 sec  
 D11 0.03000000 sec  
 TDO 1

===== CHANNEL f1 =====  
 SF01 125.7702637 MHz  
 NUC1 13C  
 P1 9.50 use  
 PLW1 90.00000000 W

===== CHANNEL f2 =====  
 SF02 500.1320005 MHz  
 NUC2 1H  
 CPDPRG12 waltz16  
 PCPD2 80.00 use  
 PLW2 24.00000000 W  
 PLW12 0.36015001 W  
 PLW13 0.23050000 W

FC - Processing parameters  
 SI 65536  
 SF 125.7577685 MHz  
 WDW EM  
 SSB 0  
 LB 1.00 Hz

<sup>13</sup>C-NMR of compound 4f

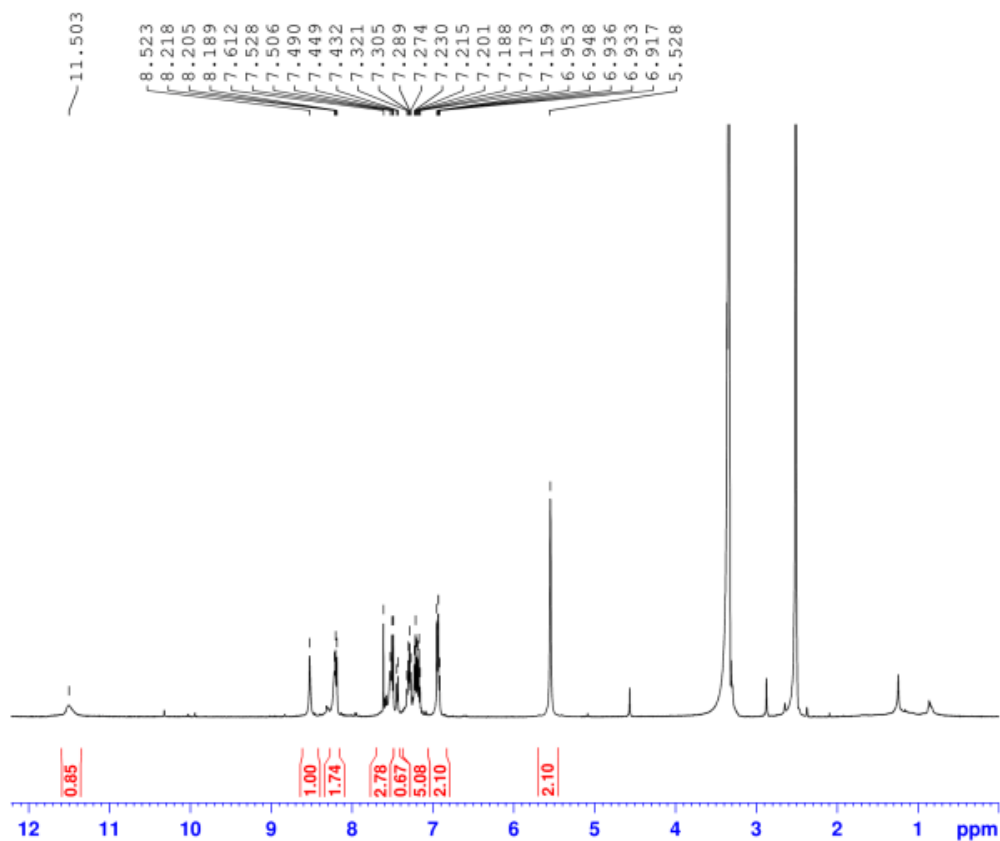

<sup>1</sup>H-NMR of compound 4g

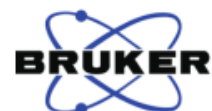

```

Current Data Parameters
NAME      TAnh-105G
EXPNO    30
PROCNO   1

F2 - Acquisition Parameters
Date_    20191117
Time     5.25
INSTRUM spect
PROBHD   5 mm PABBO BB/
PULPROG zg30
TD       65536
SOLVENT  DMSO
NS       16
DS       2
SWH      10000.000 Hz
FIDRES   0.152588 Hz
AQ       3.2767999 sec
RG       191.38
DW       50.000 usec
DE       6.50 usec
TE       299.0 K
D1       1.00000000 sec
TD0      1

----- CHANNEL f1 -----
SFO1    500.1330885 MHz
NUC1     1H
P1       9.80 usec
PLW1    24.00000000 W

F2 - Processing parameters
SI       65536
SF       500.1300000 MHz
WDW      EM
SSB      0
LB       0.30 Hz
GB       0
PC       1.00
  
```

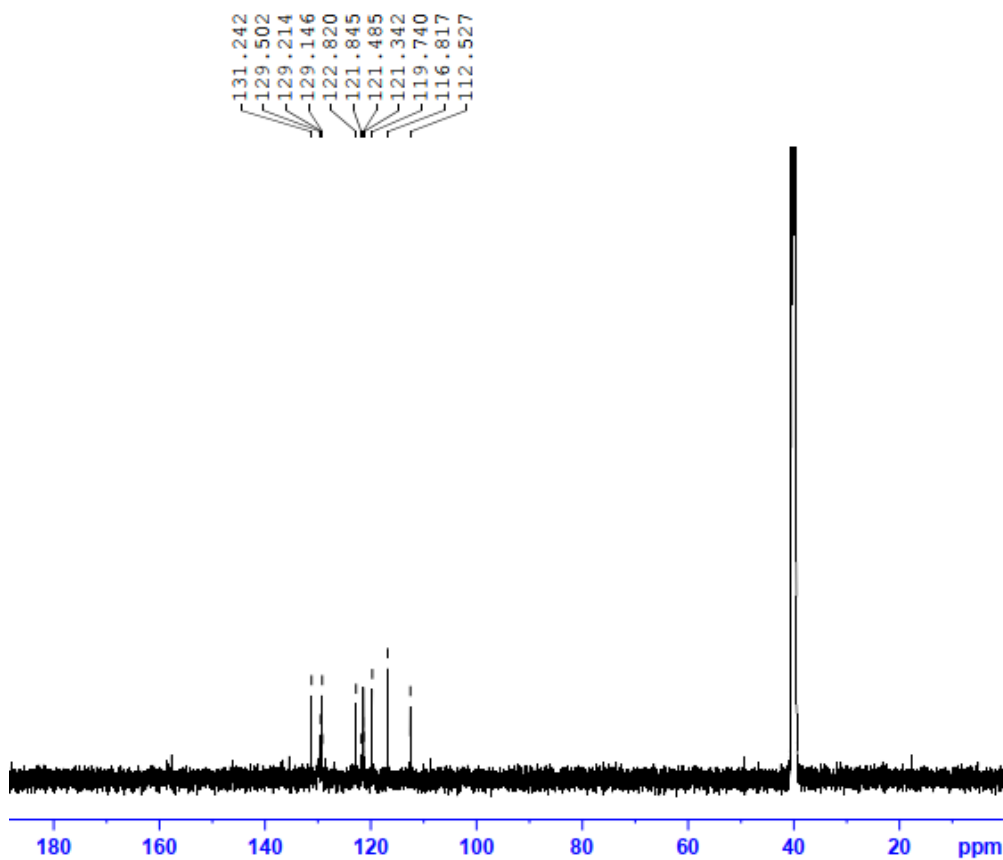

<sup>13</sup>C-NMR of compound 4g

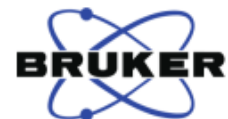

```

Current Data Parameters
NAME      TAnh-105G
EXPNO    30
PROCNO   1

F2 - Acquisition Parameters
Date_    20191117
Time     12.31
INSTRUM spect
PROBHD   5 mm PABBO BB/
PULPROG zgpg30
TD       65536
SOLVENT  DMSO
NS       8192
DS       4
SWH      31250.000 Hz
FIDRES   0.476837 Hz
AQ       1.0485760 sec
RG       191.38
DW       16.000 usec
DE       6.50 usec
TE       299.6 K
D1       2.00000000 sec
D11      0.03000000 sec
TD0      1

===== CHANNEL f1 =====
SFO1    125.7702637 MHz
NUC1     13C
P1       9.50 usec
PLW1    90.00000000 W

===== CHANNEL f2 =====
SFO2    500.1320005 MHz
NUC2     1H
CPDPRG12 waltz16
PCPD02   80.00 usec
PLW2    24.00000000 W
PLW12   0.26015001 W
PLW13   0.23050000 W

F2 - Processing parameters
SI       65536
SF       125.7577885 MHz
WDW      EM
SSB      0
PC       1.00 usec
  
```



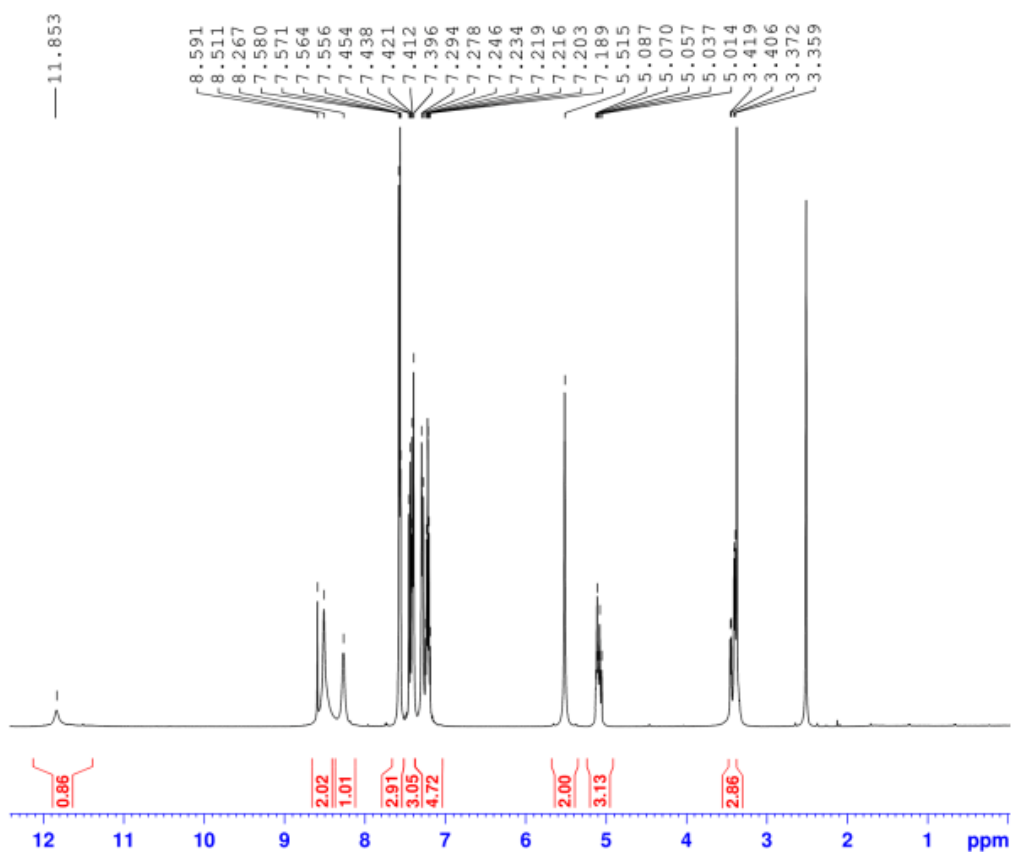

<sup>1</sup>H-NMR of compound 4h

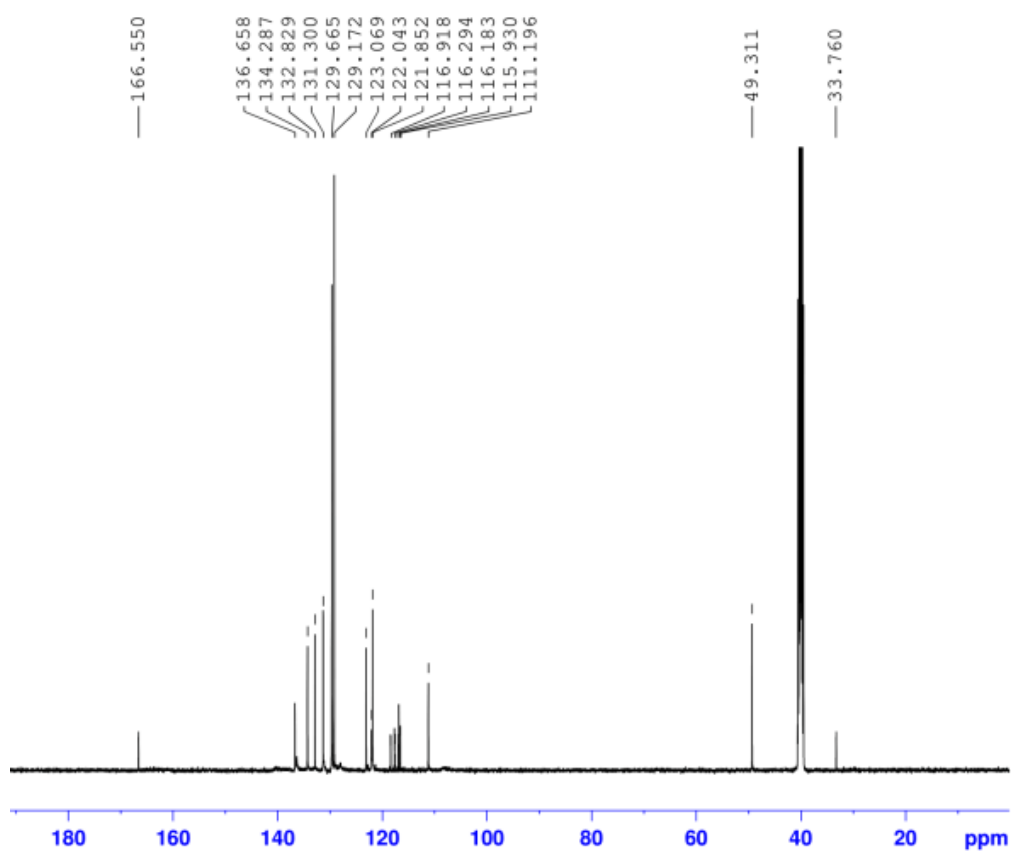

<sup>13</sup>C-NMR of compound 4h

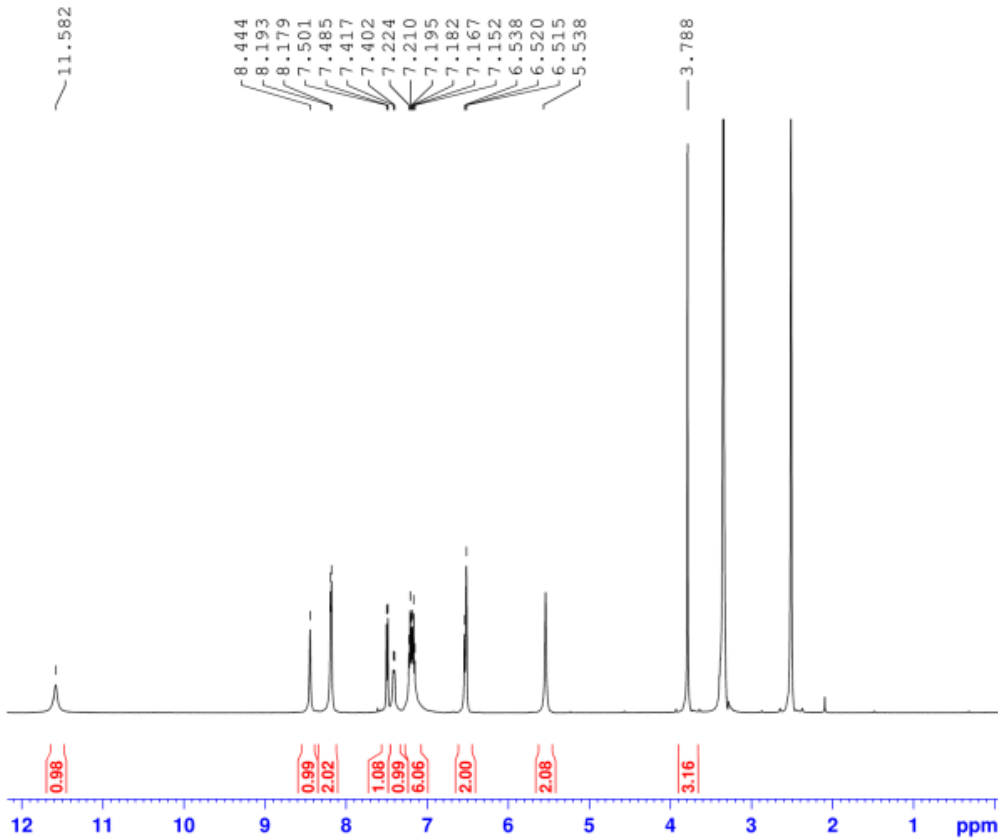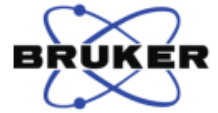

```

Current Data Parameters
NAME      TANh-105I
EXPNO    20
PROCNO   1

F2 - Acquisition Parameters
Date_    20191029
Time     9.37
INSTRUM spect
PROBHD   5 mm PABBO BB/
PULPROG zg30
TD       65536
SOLVENT  DMSO
NS       16
DS       2
SWH      10000.000 Hz
FIDRES   0.152588 Hz
AQ       3.2767999 sec
RG       152.54
DW       50.000 usec
DE       6.50 usec
TE       298.9 K
D1       1.00000000 sec
TD0      1

----- CHANNEL f1 -----
SF01    500.1330885 MHz
NUC1     1H
P1       9.80 usec
PLW1    24.00000000 W

F2 - Processing parameters
SI       65536
SF       500.1300000 MHz
WDW      EM
SSB      0
LB       0.30 Hz
GB       0
PC       1.00
  
```

<sup>1</sup>H-NMR of compound 4i

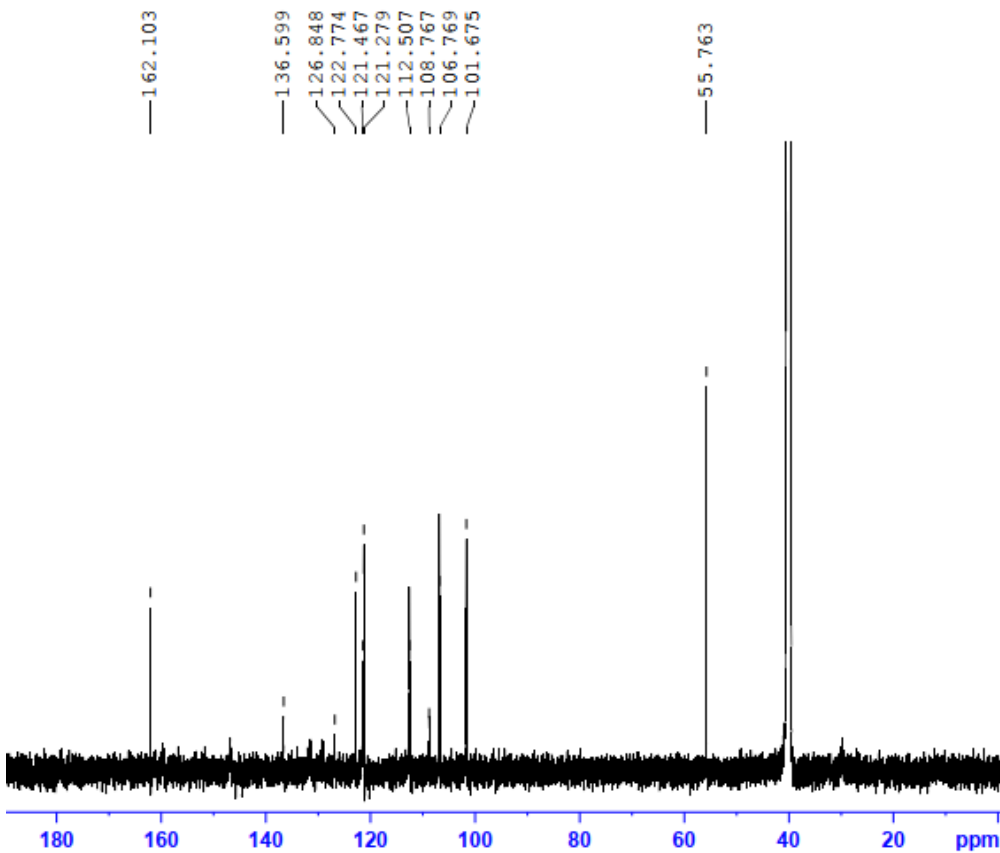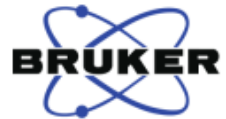

```

Current Data Parameters
NAME      TANh-105I
EXPNO    21
PROCNO   1

F2 - Acquisition Parameters
Date_    20191029
Time     10.41
INSTRUM spect
PROBHD   5 mm PABBO BB/
PULPROG zgpg30
TD       65536
SOLVENT  DMSO
NS       4096
DS       4
SWH      31250.000 Hz
FIDRES   0.476837 Hz
AQ       1.0488760 sec
RG       191.38
DW       16.000 usec
DE       6.50 usec
TE       299.6 K
D1       2.00000000 sec
D11      0.03000000 sec
TD0      1

===== CHANNEL f1 =====
SF01    125.7703637 MHz
NUC1     13C
P1       9.50 usec
PLW1    90.00000000 W

===== CHANNEL f2 =====
SF02    500.1320005 MHz
NUC2     1H
CPDPRG12 waltz16
PCPD02   80.00 usec
PLW2    24.00000000 W
PLW12   0.36015001 W
PLW13   0.28050000 W

F2 - Processing parameters
SI       65536
SF       125.7877888 MHz
WDW      EM
SSB      0
LB       1.00 Hz
  
```

<sup>13</sup>C-NMR of compound 4i

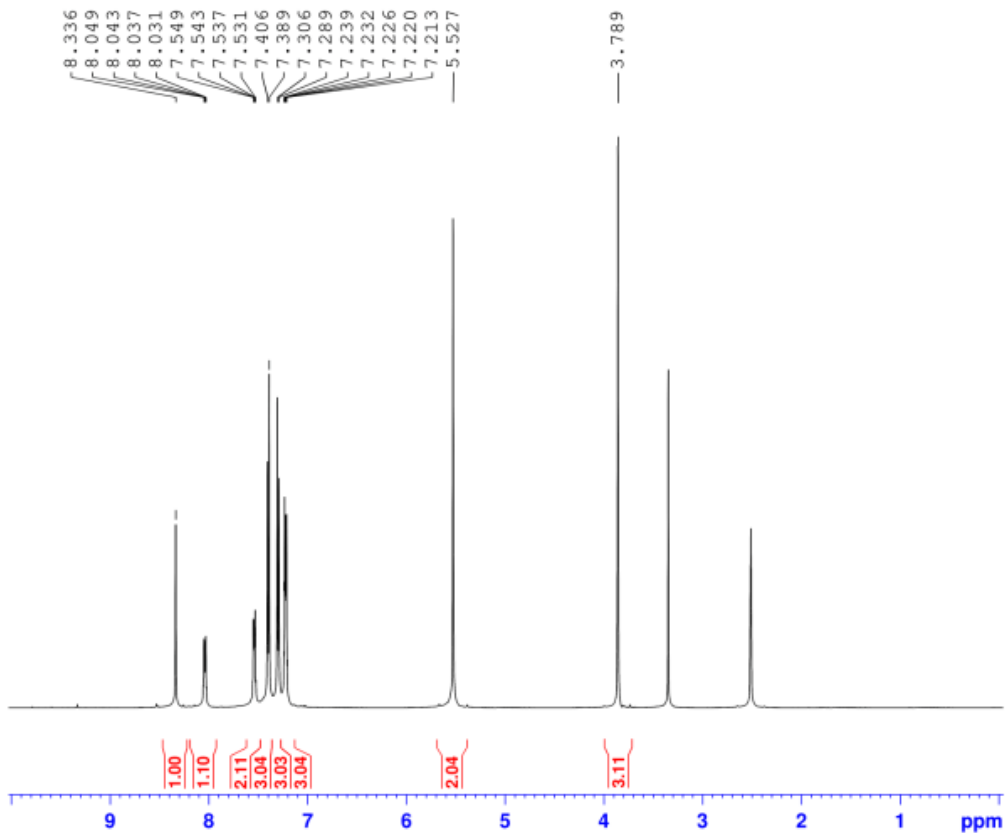

<sup>1</sup>H-NMR of compound 4j

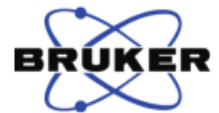

Current Data Parameters  
 NAME Tien Anh-105J  
 EXPNO 10  
 PROCNO 1

F2 - Acquisition Parameters  
 Date\_ 20200117  
 Time 19.03  
 INSTRUM spect  
 PROBHD 5 mm PABBO BB/  
 PULPROG zg30  
 TD 65536  
 SOLVENT DMSO  
 NS 16  
 DS 2  
 SWH 10000.000 Hz  
 FIDRES 0.152588 Hz  
 AQ 3.2767999 sec  
 RG 108.52  
 DW 50.000 usec  
 DE 6.50 usec  
 TE 298.0 K  
 D1 1.0000000 sec  
 TD0 1

==== CHANNEL f1 =====  
 SFO1 500.1330885 MHz  
 NUC1 1H  
 P1 9.80 usec  
 PLW1 24.00000000 W

F2 - Processing parameters  
 SI 65536  
 SF 500.1300000 MHz  
 WDN EM  
 SSB 0  
 LB 0.30 Hz  
 GB 0  
 PC 1.00

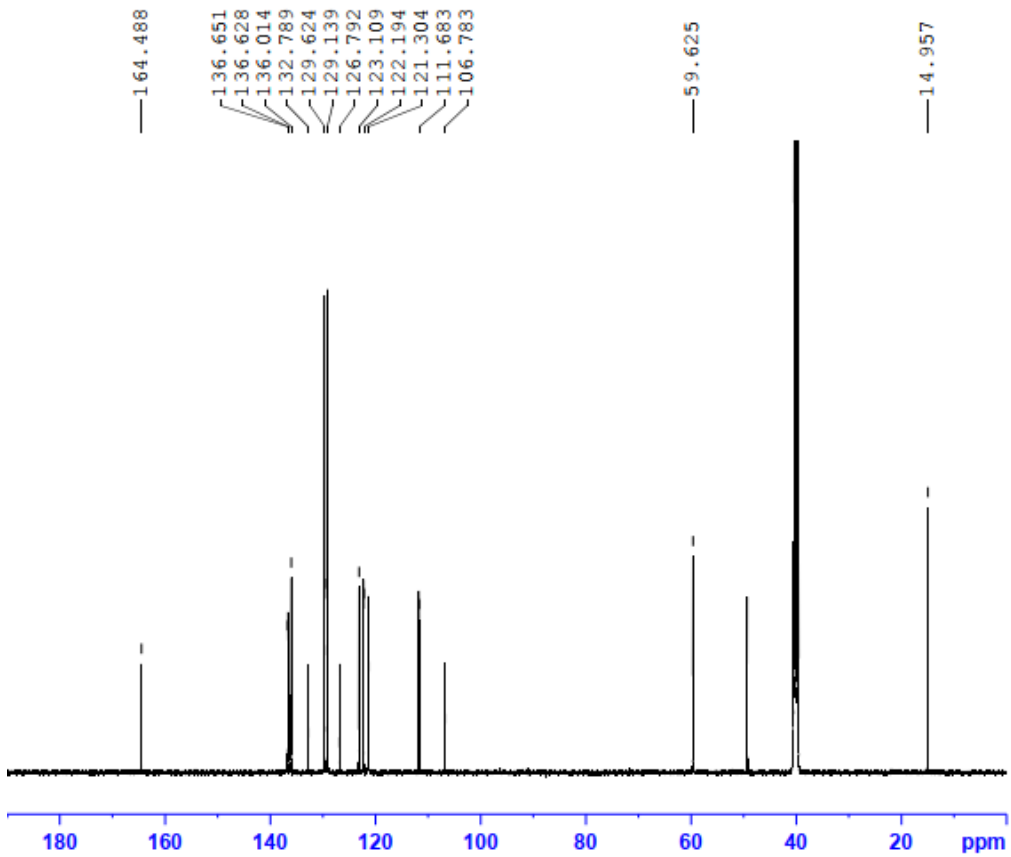

<sup>13</sup>C-NMR of compound 4j

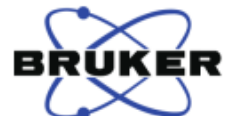

Current Data Parameters  
 NAME Tien Anh-105J  
 EXPNO 11  
 PROCNO 1

F2 - Acquisition Parameters  
 Date\_ 20200117  
 Time 20.51  
 INSTRUM spect  
 PROBHD 5 mm PABBO BB/  
 PULPROG zgpg30  
 TD 65536  
 SOLVENT DMSO  
 NS 2048  
 DS 4  
 SWH 31250.000 Hz  
 FIDRES 0.476827 Hz  
 AQ 1.0485760 sec  
 RG 191.38  
 DW 16.000 usec  
 DE 6.50 usec  
 TE 299.3 K  
 D1 2.00000000 sec  
 D11 0.02000000 sec  
 TD0 1

==== CHANNEL f1 =====  
 SFO1 125.7704637 MHz  
 NUC1 13C  
 P1 9.50 usec  
 PLW1 90.00000000 W

==== CHANNEL f2 =====  
 SFO2 500.1320005 MHz  
 NUC2 1H  
 CPDPRG12 waltz16  
 PCPD2 80.00 usec  
 PLW2 24.00000000 W  
 PLW12 0.36015001 W  
 PLW13 0.22050000 W

F2 - Processing parameters  
 SI 65536  
 SF 125.7577888 MHz  
 WDN EM  
 SSB 0  
 LB 1.00 Hz

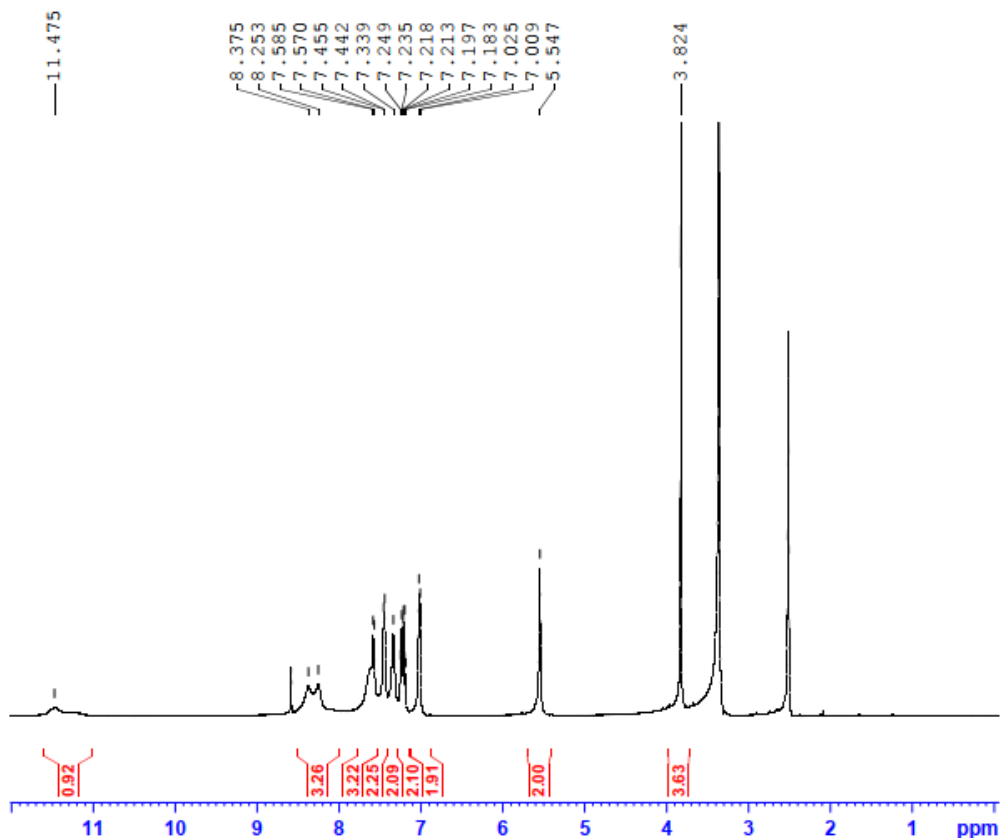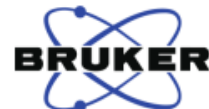

```

Current Data Parameters
NAME      Tank-105K
EXPNO    20
PROCNO   1

F2 - Acquisition Parameters
Date_    20191125
Time     4.27
INSTRUM  spect
PROBHD   5 mm PABBO BB/
PULPROG  zg30
TD       65536
SOLVENT  DMSO
NS       16
DS       2
SWH      10000.000 Hz
FIDRES   0.152588 Hz
AQ       3.2767999 sec
RG       138.87
DN       80.000 usec
DE       6.50 usec
TE       299.2 K
D1       1.0000000 sec
TDO      1

===== CHANNEL f1 =====
SF01    500.1320885 MHz
NUC1    1H
P1      9.80 usec
PLW1    24.0000000 W

F2 - Processing parameters
SI      65536
SF      500.1300000 MHz
WDW     EM
SSB     0
LB      0.20 Hz
GB      0
PC      1.00
  
```

<sup>1</sup>H-NMR of compound 4k

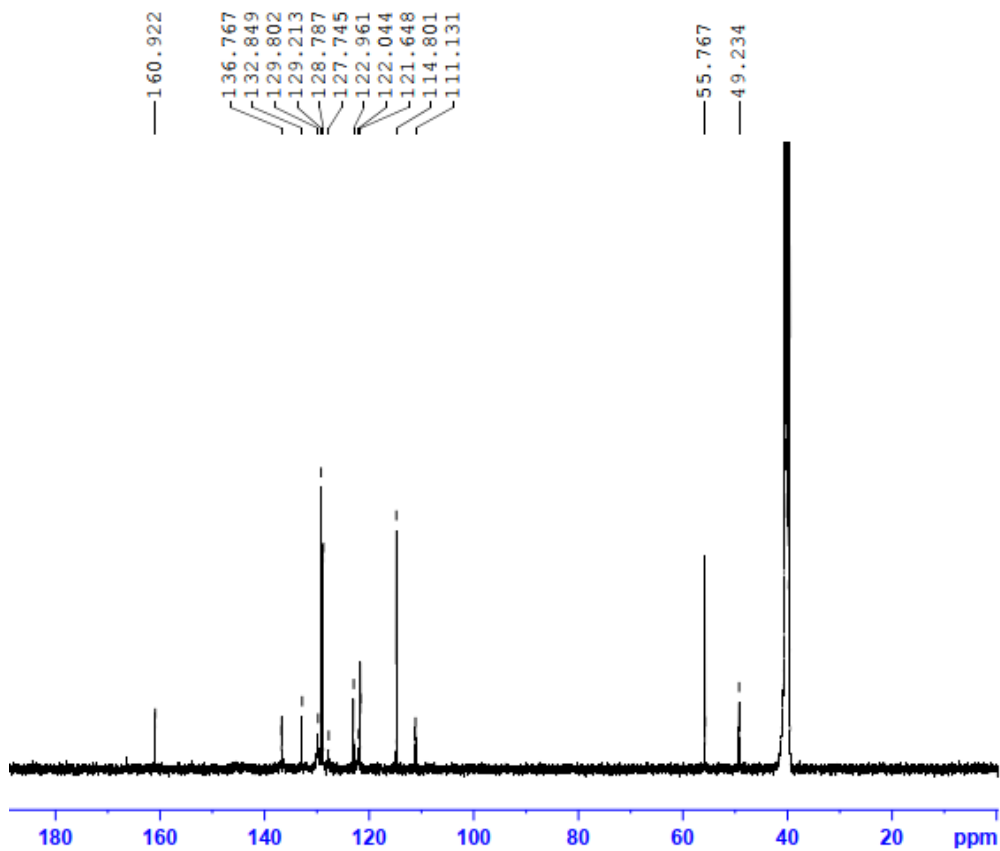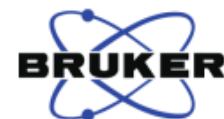

```

Current Data Parameters
NAME      Tank-105K
EXPNO    22
PROCNO   1

F2 - Acquisition Parameters
Date_    20191125
Time     8.01
INSTRUM  spect
PROBHD   5 mm PABBO BB/
PULPROG  zgpg30
TD       65536
SOLVENT  DMSO
NS       4096
DS       4
SWH      31250.000 Hz
FIDRES   0.476837 Hz
AQ       1.0488760 sec
RG       191.28
DN       16.000 usec
DE       6.50 usec
TE       299.2 K
D1       2.0000000 sec
D11      0.0300000 sec
TDO      1

===== CHANNEL f1 =====
SF01    125.7702637 MHz
NUC1    13C
P1      9.50 usec
PLW1    90.0000000 W

===== CHANNEL f2 =====
SF02    500.1320008 MHz
NUC2    1H
CPDPRG2  waltz16
PCPD2    80.00 usec
PLW2    24.0000000 W
PLW12   0.36018001 W
PLW13   0.23050000 W

F2 - Processing parameters
SI      65536
SF      125.7577885 MHz
WDW     EM
SSB     0
LB      1.00 Hz
  
```

<sup>13</sup>C-NMR of compound 4k

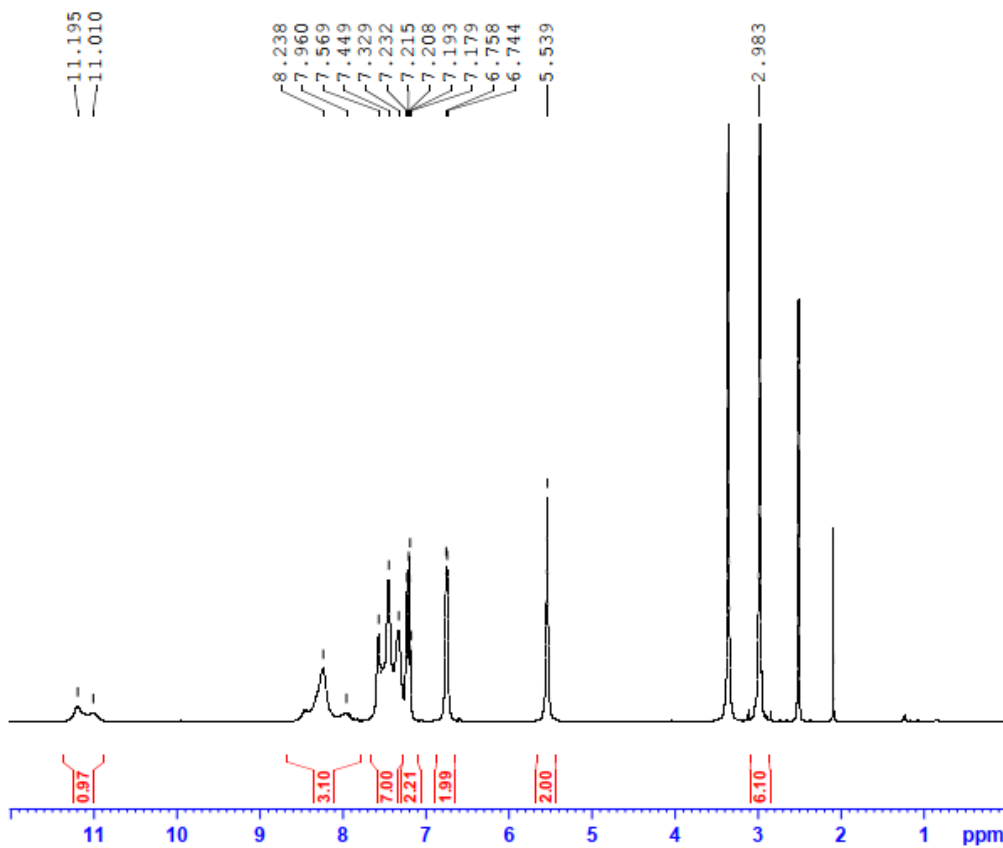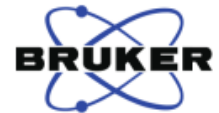

```

Current Data Parameters
NAME      Tanh-10SL
EXPNO    10
PROCNO   1

F2 - Acquisition Parameters
Date_    20191108
Time     13.48
INSTRUM  spect
PROBHD   5 mm PABBO BB/
PULPROG  zgpg30
TD       65536
SOLVENT  DMSO
NS       16
DS       2
SWH      10000.000 Hz
FIDRES   0.152588 Hz
AQ       3.2767999 sec
RG       108.82
DN       50.000 usec
DE       6.50 usec
TE       298.8 K
DL       1.00000000 sec
TDO     1

===== CHANNEL f1 =====
SF01    500.1330885 MHz
NUC1    1H
P1      9.80 usec
PLW1    24.00000000 W

F2 - Processing parameters
SI      65536
SF      500.1300000 MHz
WDW     EM
SSB     0
LB      0.20 Hz
GB      0
PC      1.00
  
```

<sup>1</sup>H-NMR of compound 4l

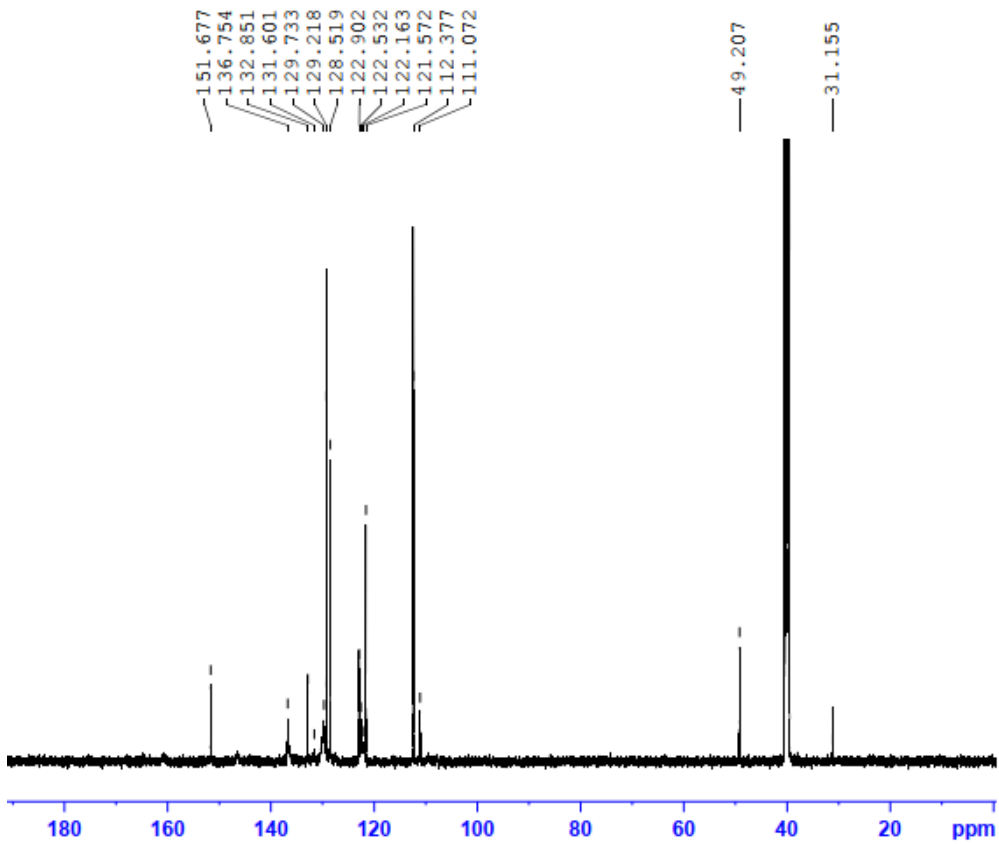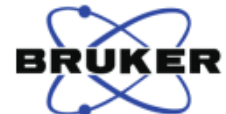

```

Current Data Parameters
NAME      Tanh-10SL
EXPNO    11
PROCNO   1

F2 - Acquisition Parameters
Date_    20191109
Time     7.37
INSTRUM  spect
PROBHD   5 mm PABBO BB/
PULPROG  zgpg30
TD       65536
SOLVENT  DMSO
NS       4096
DS       4
SWH      31250.000 Hz
FIDRES   0.476837 Hz
AQ       1.0488760 sec
RG       191.38
DN       16.000 usec
DE       6.50 usec
TE       299.8 K
DL       2.00000000 sec
D11     0.08000000 sec
TDO     1

===== CHANNEL f1 =====
SF01    125.7709637 MHz
NUC1    13C
P1      9.50 usec
PLW1    90.00000000 W

===== CHANNEL f2 =====
SF02    500.1320005 MHz
NUC2    1H
CPDPRG2  waltz16
PCPD0    80.00 usec
PLW2    24.00000000 W
PLW12   0.36018001 W
PLW13   0.23050000 W

F2 - Processing parameters
SI      65536
SF      125.7577885 MHz
WDW     EM
SSB     0
LB      1.00 Hz
  
```

<sup>13</sup>C-NMR of compound 4l

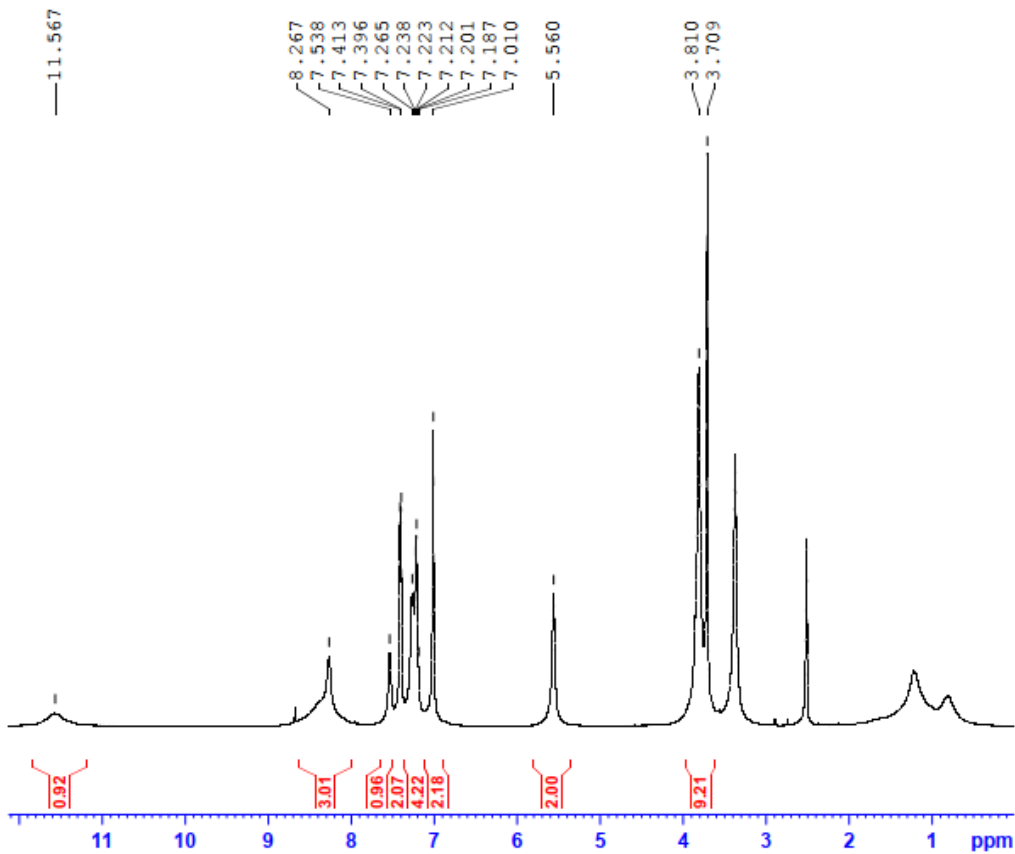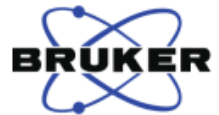

Current Data Parameters  
 NAME TANh-105M  
 EXPNO 10  
 PROCNO 1

F2 - Acquisition Parameters  
 Date\_ 20191029  
 Time 9.38  
 INSTRUM spect  
 PROBHD 5 mm PABBO BB/  
 PULPROG zg30  
 TD 65536  
 SOLVENT DMSO  
 NS 16  
 DS 2  
 SMH 10000.000 Hz  
 FIDRES 0.182588 Hz  
 AQ 3.2767999 sec  
 RG 70.26  
 DW 50.000 usec  
 DE 6.50 usec  
 TE 299.0 K  
 D1 1.00000000 sec  
 TDO 1

===== CHANNEL f1 =====  
 SF01 500.1320885 MHz  
 NUC1 1H  
 P1 9.80 usec  
 PLW1 24.00000000 W

F2 - Processing parameters  
 SI 65536  
 SF 500.1320000 MHz  
 WDW EM  
 SSB 0  
 LB 0.30 Hz  
 GB 0  
 PC 1.00

<sup>1</sup>H-NMR of compound 4m

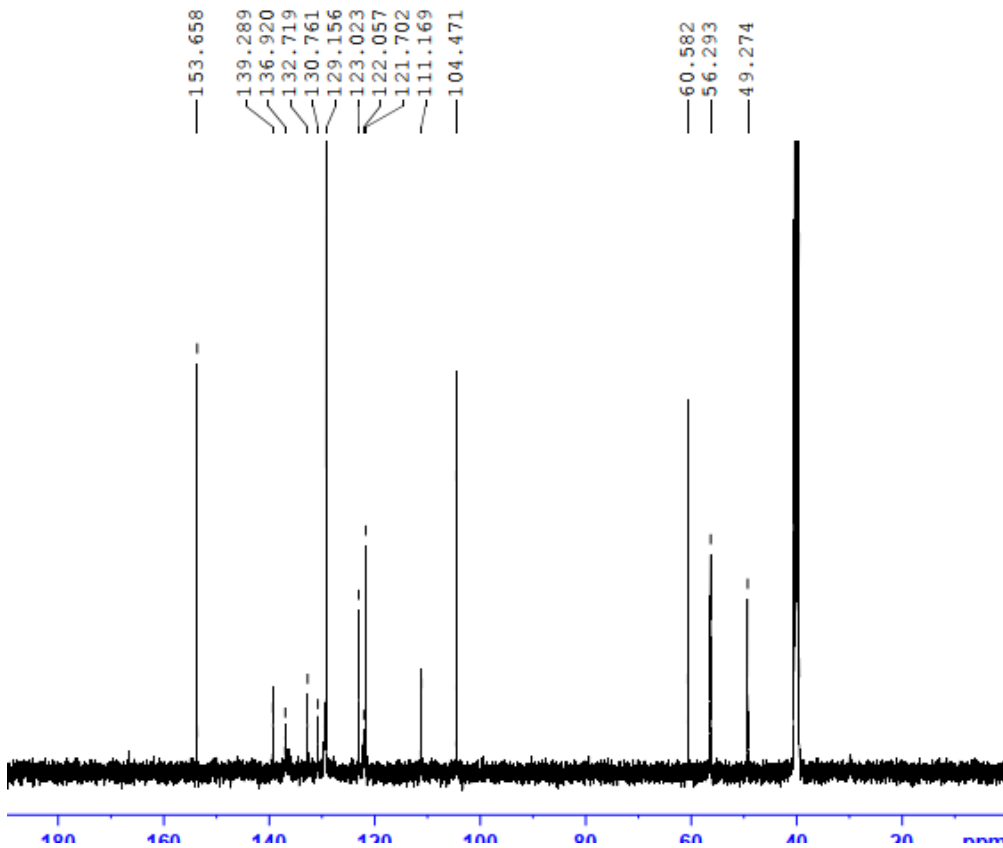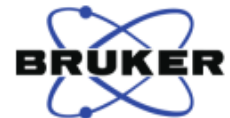

Current Data Parameters  
 NAME TANh-105M  
 EXPNO 11  
 PROCNO 1

F2 - Acquisition Parameters  
 Date\_ 20191029  
 Time 9.51  
 INSTRUM spect  
 PROBHD 5 mm PABBO BB/  
 PULPROG zgpg30  
 TD 65536  
 SOLVENT DMSO  
 NS 64  
 DS 4  
 SMH 31250.000 Hz  
 FIDRES 0.476837 Hz  
 AQ 1.0488780 sec  
 RG 191.28  
 DW 16.000 usec  
 DE 6.50 usec  
 TE 299.3 K  
 D1 2.00000000 sec  
 D11 0.08000000 sec  
 TDO 1

===== CHANNEL f1 =====  
 SF01 125.7702627 MHz  
 NUC1 13C  
 P1 9.50 usec  
 PLW1 90.00000000 W

===== CHANNEL f2 =====  
 SF02 500.1320005 MHz  
 NUC2 1H  
 CPDPRG[2] waltz16  
 PCPD2 80.00 usec  
 PLW2 24.00000000 W  
 PLW12 0.26018001 W  
 PLW13 0.23050000 W

F2 - Processing parameters  
 SI 65536  
 SF 125.7577885 MHz  
 WDW em  
 SSB 0

<sup>13</sup>C-NMR of compound 4m

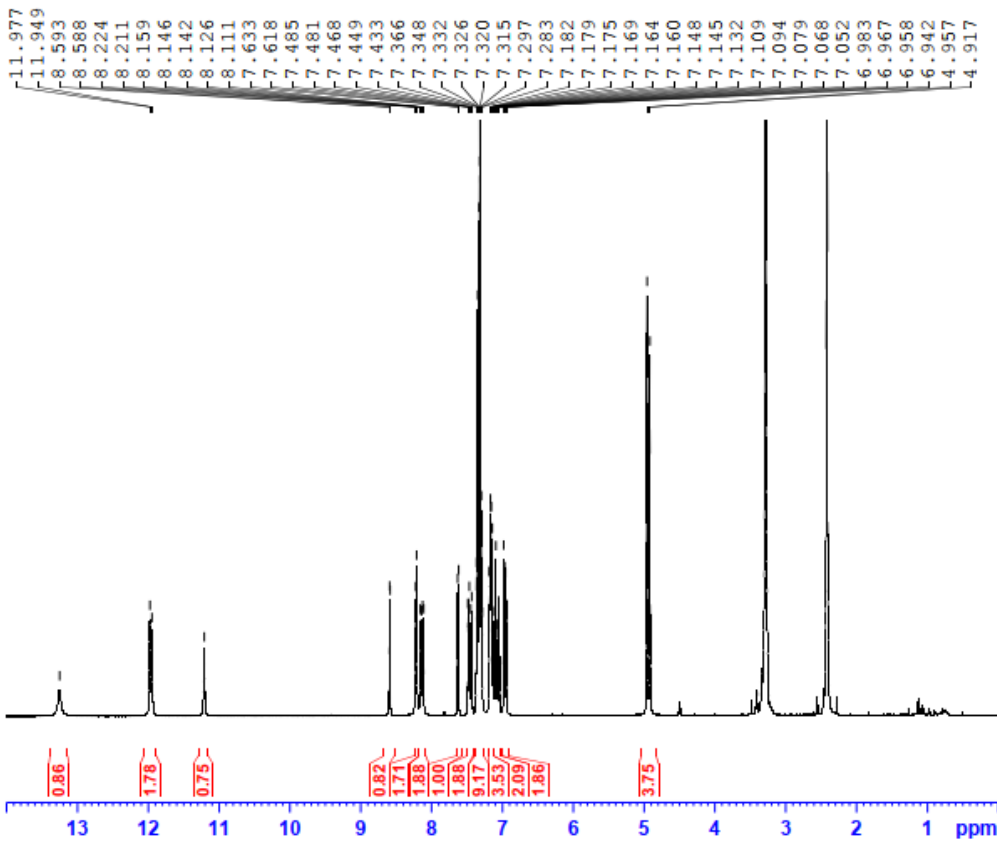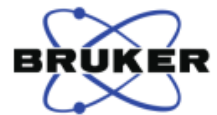

Current Data Parameters  
 NAME TAnh-104A  
 EXPNO 1  
 PROCNO 1

PC - Acquisition Parameters  
 Date\_ 20191217  
 Time 8.45  
 INSTRUM spect  
 PROBHD 5 mm PABBO BB/  
 PULPROG zg30  
 TD 65536  
 SOLVENT DMSO  
 NS 16  
 DS 2  
 SWH 10000.000 Hz  
 FIDRES 0.182388 Hz  
 AQ 3.2787999 sec  
 RG 87.52  
 DW 50.000 usec  
 DE 6.50 usec  
 TE 298.7 K  
 DL 1.00000000 sec  
 TDO 1

===== CHANNEL f1 =====  
 SF01 500.1300885 MHz  
 NUC1 1H  
 P1 9.80 usec  
 PLW1 24.00000000 W

PC - Processing parameters  
 SI 65536  
 SF 500.1300465 MHz  
 WDW EM  
 SSB 0  
 LB 0.30 Hz  
 GB 0  
 PC 1.00

<sup>1</sup>H-NMR of compound 5a

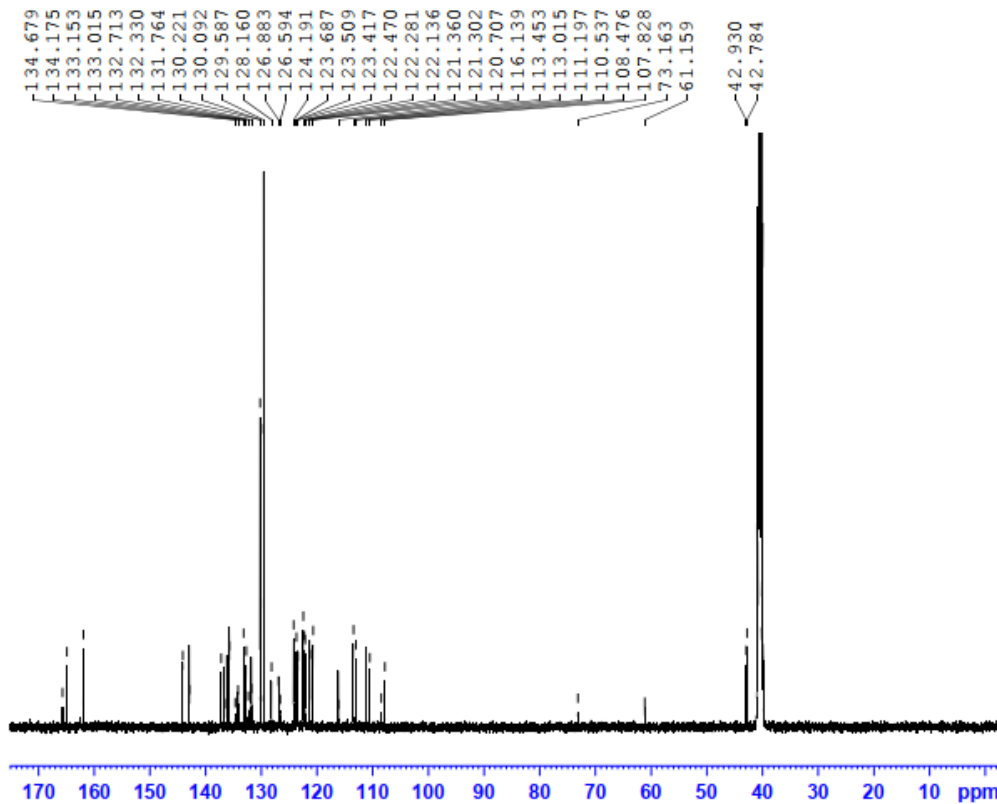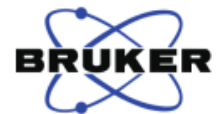

Current Data Parameters  
 NAME TAnh-104A  
 EXPNO 1  
 PROCNO 1

PC - Acquisition Parameters  
 Date\_ 20191217  
 Time 23.23  
 INSTRUM spect  
 PROBHD 5 mm PABBO BB/  
 PULPROG zgpg30  
 TD 65536  
 SOLVENT DMS  
 NS 2048  
 DS 4  
 SWH 31250.000 Hz  
 FIDRES 0.476837 Hz  
 AQ 1.0485760 sec  
 RG 191.38  
 DW 16.000 usec  
 DE 6.50 usec  
 TE 299.6 K  
 DL 2.00000000 sec  
 DLI 0.03000000 sec  
 TDO 1

===== CHANNEL f1 =====  
 SF01 125.7708637 MHz  
 NUC1 13C  
 P1 9.80 usec  
 PLW1 90.00000000 W

===== CHANNEL f2 =====  
 SF02 500.1320005 MHz  
 NUC2 1H  
 CPDPRG12 waltz16  
 PCPD2 80.00 usec  
 PLW2 24.00000000 W  
 PLW12 0.36015001 W  
 PLW13 0.22080000 W

PC - Processing parameters  
 SI 65536  
 SF 125.7677885 MHz  
 WDW EM  
 SSB 0  
 LB 1.00 Hz

<sup>13</sup>C-NMR of compound 5a





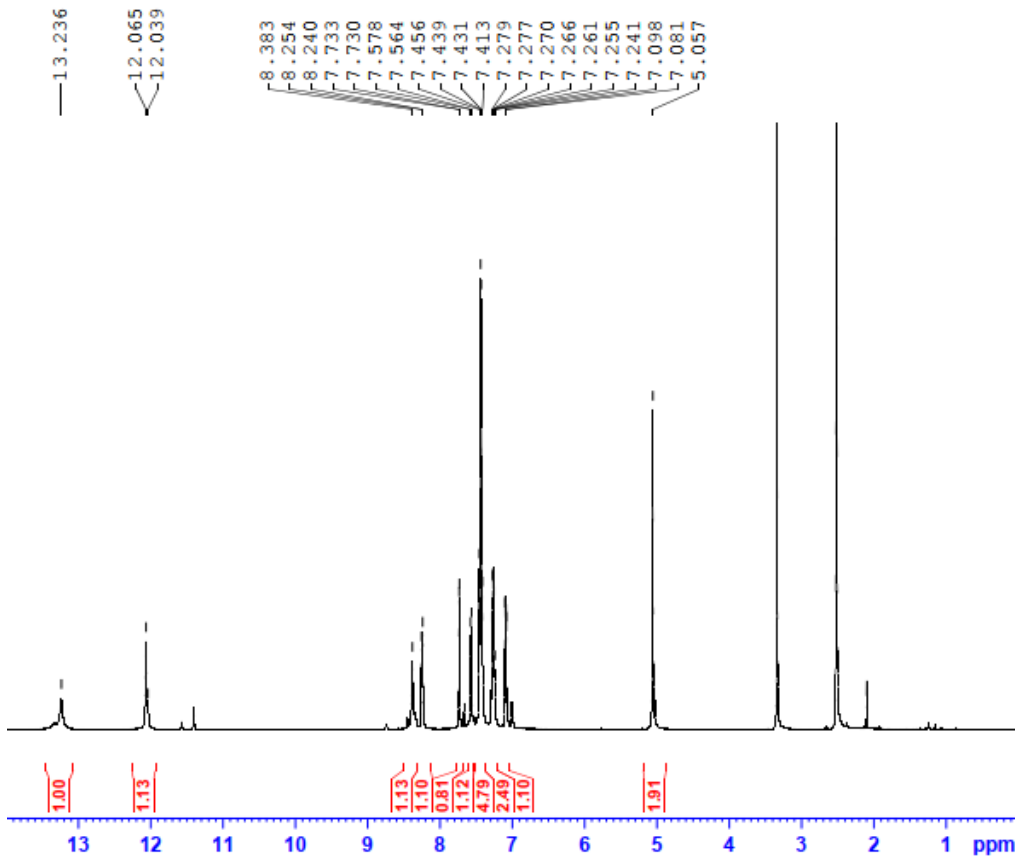

**BRUKER**

Current Data Parameters  
 NAME Tien Anh-104C  
 EXPNO 20  
 PROCNO 1

PC - Acquisition Parameters  
 Date\_ 20200117  
 Time\_ 20.55  
 INSTRUM spect  
 PROBHD 5 mm PABBO BB/  
 PULPROG zgpg30  
 TD 65536  
 SOLVENT DMSO  
 NS 16  
 DS 2  
 SSW 10000.000 Hz  
 FIDRES 0.152588 Hz  
 AQ 3.2787999 sec  
 RG 191.38  
 DW 50.000 usec  
 DE 6.50 usec  
 TE 298.6 K  
 D1 1.00000000 sec  
 TDO 1

===== CHANNEL f1 =====  
 SF01 500.1320885 MHz  
 NUCL 1H  
 PL 9.80 usec  
 PLW1 24.00000000 W

PC - Processing parameters  
 SI 65536  
 SF 500.1300000 MHz  
 WDW EM  
 SSB 0  
 LB 0.20 Hz  
 GB 0  
 PC 1.00

<sup>1</sup>H-NMR of compound 5c

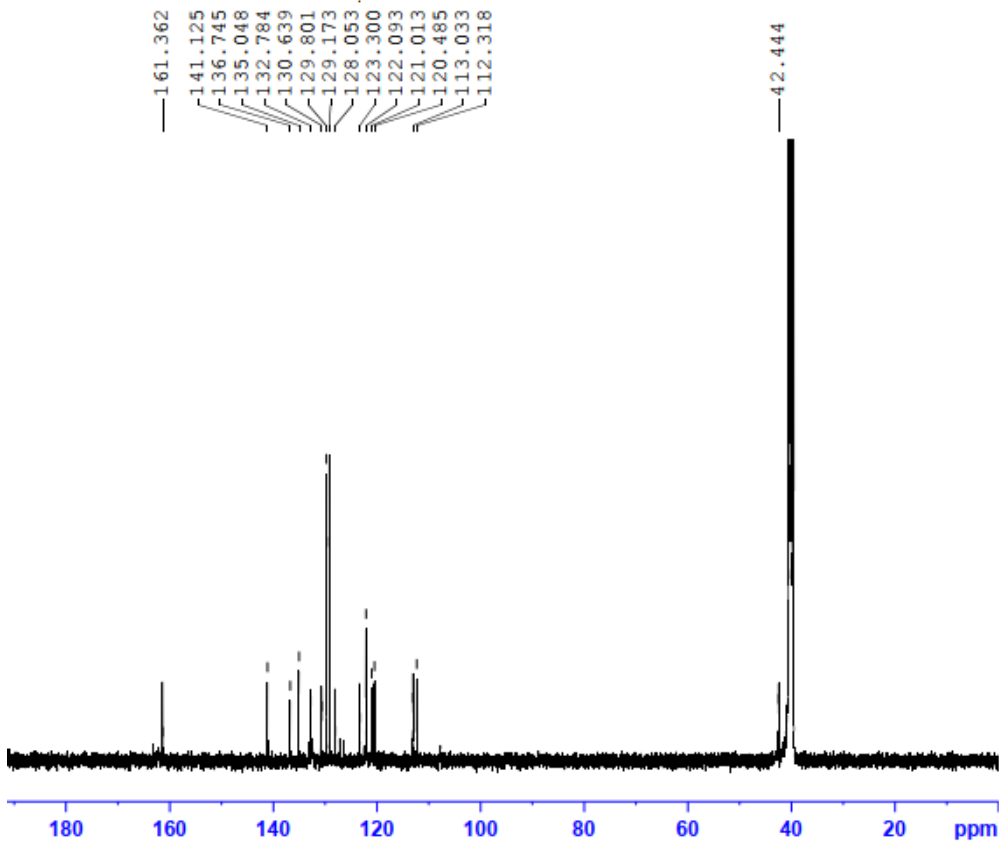

**BRUKER**

Current Data Parameters  
 NAME Tien Anh-104C  
 EXPNO 21  
 PROCNO 1

PC - Acquisition Parameters  
 Date\_ 20200117  
 Time\_ 22.48  
 INSTRUM spect  
 PROBHD 5 mm PABBO BB/  
 PULPROG zgpg30  
 TD 65536  
 SOLVENT DMSO  
 NS 2048  
 DS 4  
 SSW 31250.000 Hz  
 FIDRES 0.476837 Hz  
 AQ 1.0488760 sec  
 RG 191.38  
 DW 16.000 usec  
 DE 6.50 usec  
 TE 299.1 K  
 D1 2.00000000 sec  
 D11 0.03000000 sec  
 TDO 1

===== CHANNEL f1 =====  
 SF01 125.7709637 MHz  
 NUCL 13C  
 PL 9.50 usec  
 PLW1 90.00000000 W

===== CHANNEL f2 =====  
 SF02 500.1320005 MHz  
 NUCL 1H  
 CPDPRG12 waltz16  
 PCPD2 80.00 usec  
 PLW2 24.00000000 W  
 PLW12 0.36018001 W  
 PLW13 0.23050000 W

PC - Processing parameters  
 SI 65536  
 SF 125.7577888 MHz  
 WDW EM  
 SSB 0  
 LB 1.00 Hz

<sup>13</sup>C-NMR of compound 5c

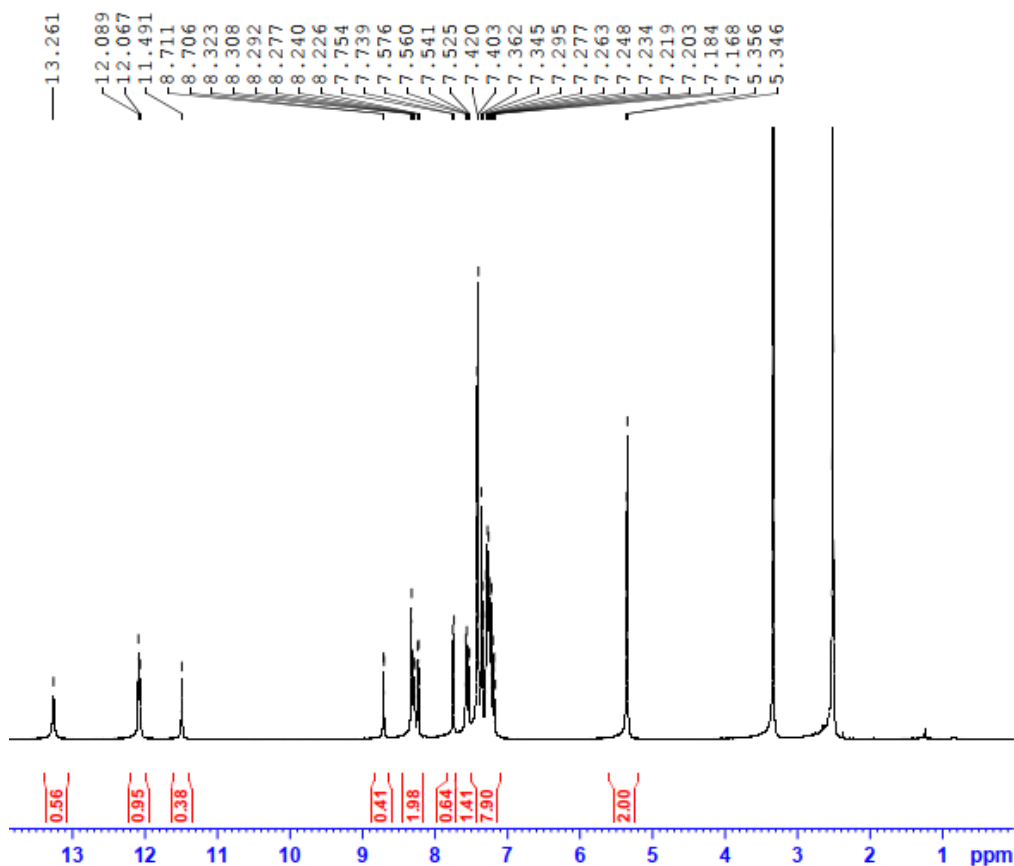

<sup>1</sup>H-NMR of compound 5d

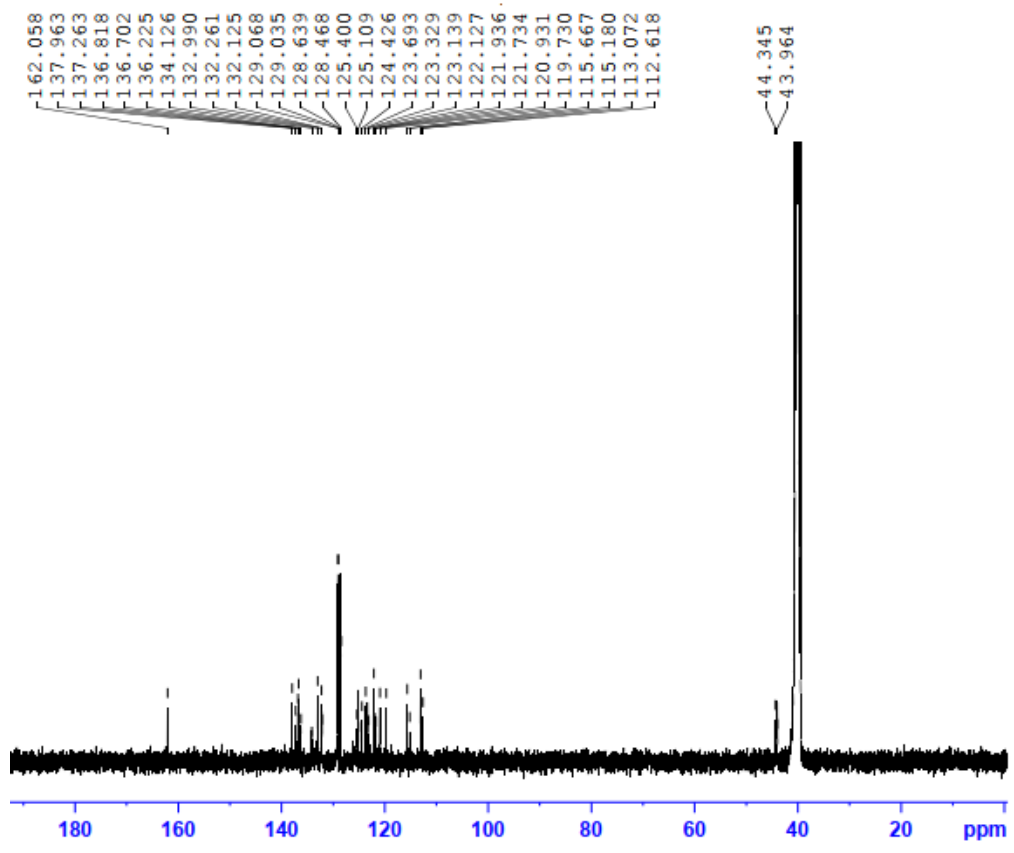

<sup>13</sup>C-NMR of compound 5d

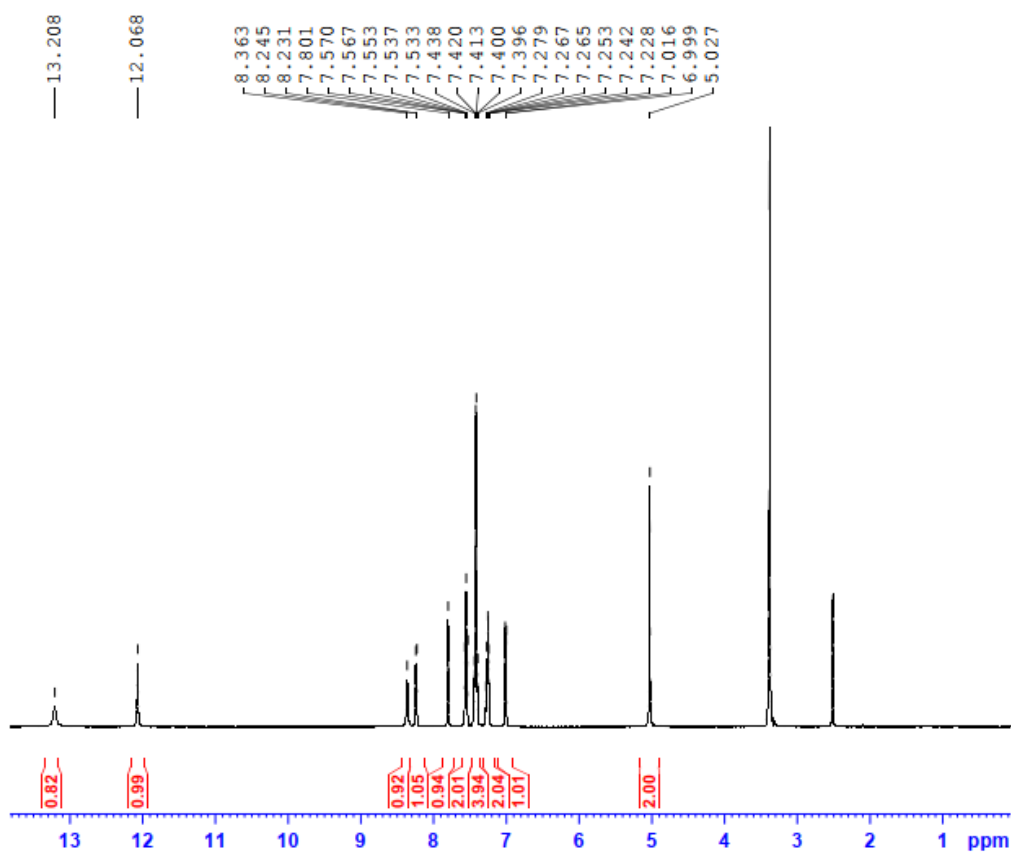

<sup>1</sup>H-NMR of compound 5e

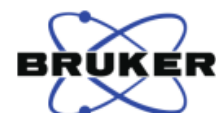

```

Current Data Parameters
NAME      TAnh-104E-2
EXPNO    20
PROCNO   1

FC - Acquisition Parameters
Date_    20200316
Time     13.47
INSTRUM spect
PROBHD   5 mm PABBO BB/
PULPROG zg30
TD       65536
SOLVENT  DMSO
NS       16
DS       2
SWH      10000.000 Hz
FIDRES   0.152588 Hz
AQ       3.2767999 sec
RG       95.24
DN       50.000 usec
DE       6.50 usec
TE       298.5 K
D1       1.00000000 sec
TDO      1

===== CHANNEL f1 =====
SF01    500.1320885 MHz
NUC1     1H
P1       9.80 usec
PLW1    24.00000000 W

FC - Processing parameters
SI       65536
SF       500.1320000 MHz
WDW      EM
SSB      0
LB       0.30 Hz
GB       0
PC       1.00

```

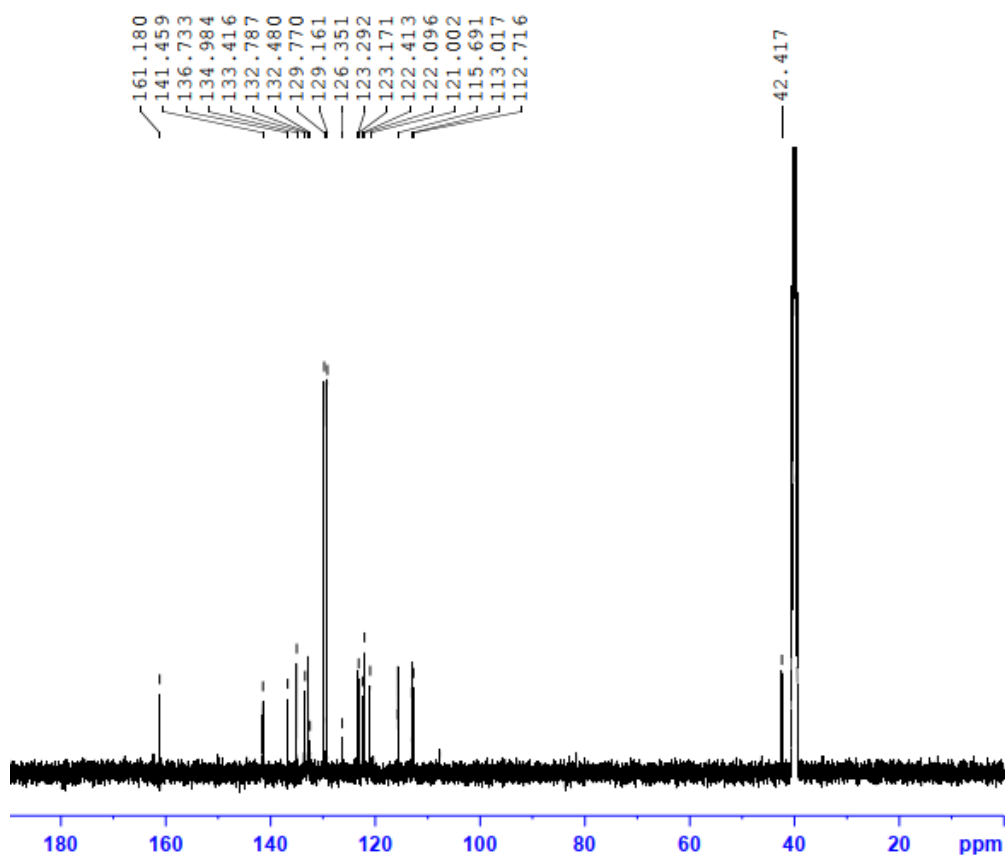

<sup>13</sup>C-NMR of compound 5e

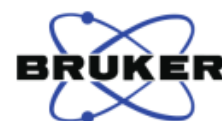

```

Current Data Parameters
NAME      TAnh-104E-2
EXPNO    21
PROCNO   1

FC - Acquisition Parameters
Date_    20200316
Time     14.21
INSTRUM spect
PROBHD   5 mm PABBO BB/
PULPROG zgpg30
TD       65536
SOLVENT  DMSO
NS       329
DS       4
SWH      31250.000 Hz
FIDRES   0.476837 Hz
AQ       1.0485760 sec
RG       191.28
DN       16.000 usec
DE       6.50 usec
TE       299.2 K
D1       2.00000000 sec
D11     0.03000000 sec
TDO      1

===== CHANNEL f1 =====
SF01    125.7703637 MHz
NUC1     13C
P1       9.50 usec
PLW1    90.00000000 W

===== CHANNEL f2 =====
SF02    500.1320005 MHz
NUC2     1H
CPDPRG12 waltz16
PCPDPC   80.00 usec
PLW2    24.00000000 W
PLW12   0.36015001 W
PLW13   0.23050000 W

FC - Processing parameters
SI       65536
SF       125.7577885 MHz
WDW      EM
SSB      0
LB       1.00 Hz
GB       0
PC       1.40

```

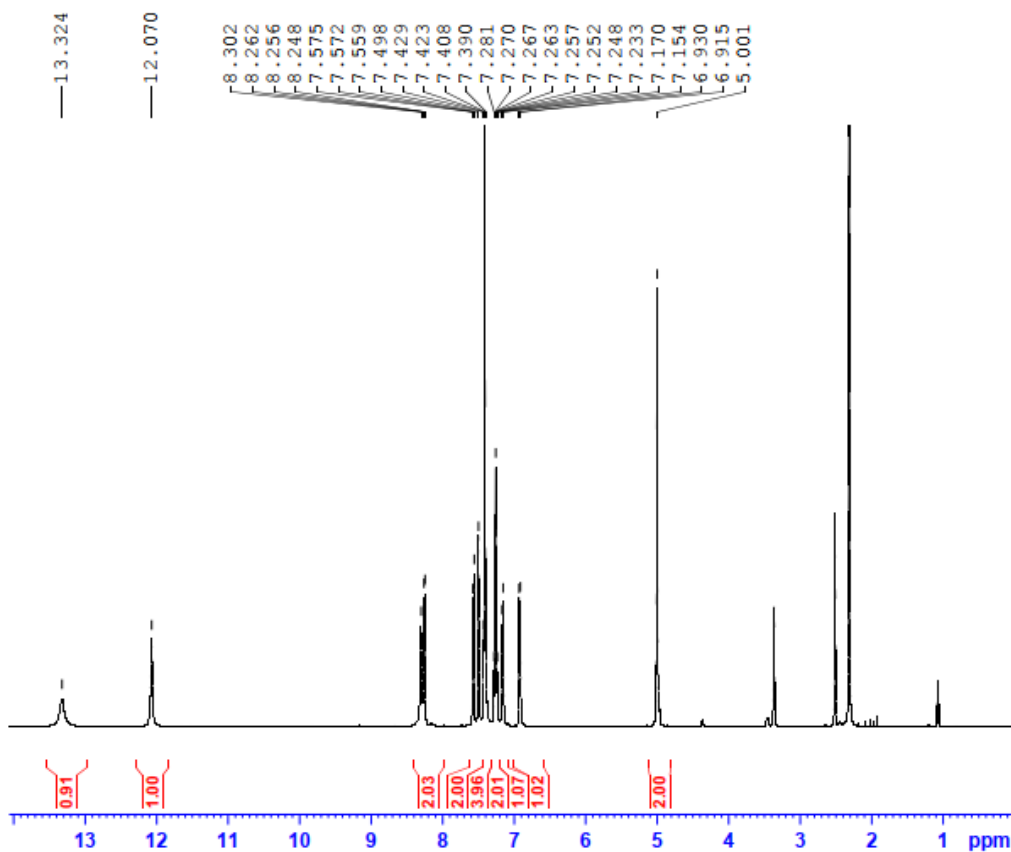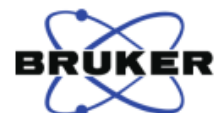

```

Current Data Parameters
NAME      Tien Anh-104F
EXPNO    50
PROCNO   1

F2 - Acquisition Parameters
Date_    20200118
Time     2.30
INSTRUM spect
PROBHD   5 mm PABBO BB/
PULPROG zg30
TD        65536
SOLVENT  DMSO
NS        16
DS         2
SWH       10000.000 Hz
FIDRES    0.182588 Hz
AQ        3.2767999 sec
RG         87.53
DN         50.000 usec
DE         6.50 usec
TE        298.7 K
D1        1.00000000 sec
TDO       1

===== CHANNEL f1 =====
SFO1     500.1320885 MHz
NUC1      1H
P1        9.80 usec
PLW1     24.00000000 W

F2 - Processing parameters
SI        65536
SF        500.1320000 MHz
WDW       EM
SSB       0
LB        0.30 Hz
GB        0
PC        1.00
  
```

<sup>1</sup>H-NMR of compound 5f

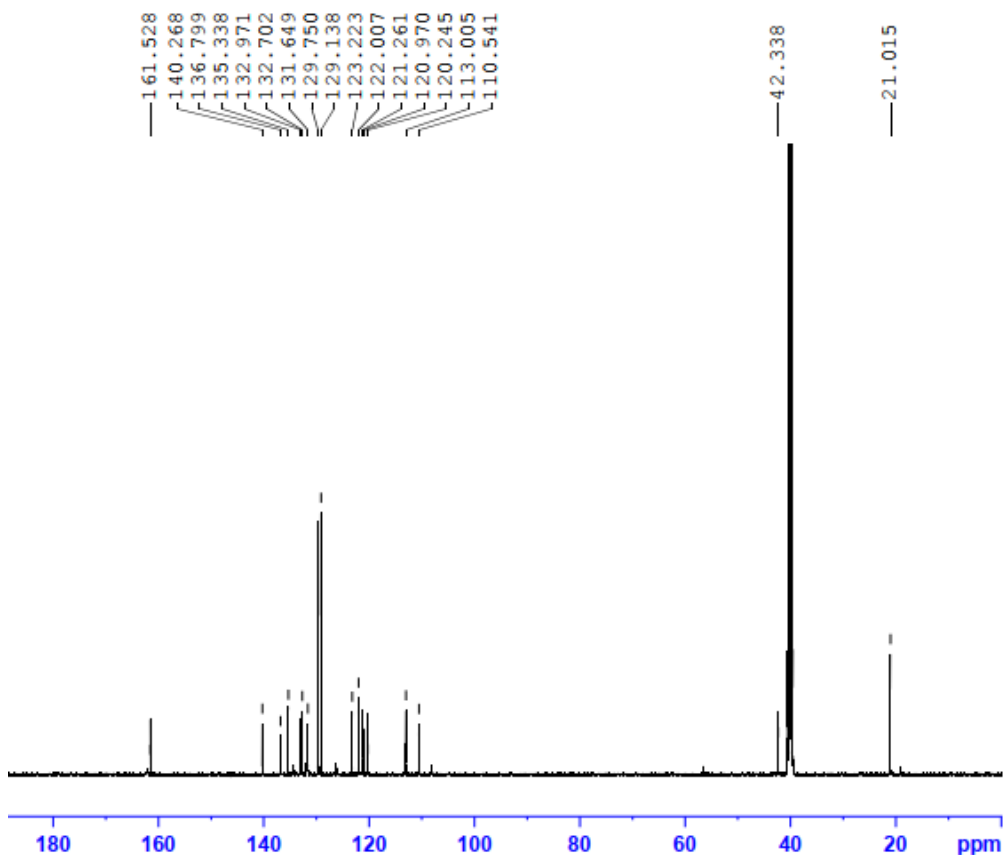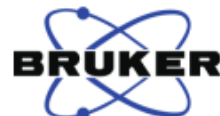

```

Current Data Parameters
NAME      Tien Anh-104F
EXPNO    51
PROCNO   1

F2 - Acquisition Parameters
Date_    20200118
Time     3.24
INSTRUM spect
PROBHD   5 mm PABBO BB/
PULPROG zgpg30
TD        65536
SOLVENT  DMSO
NS        1024
DS         4
SWH       31250.000 Hz
FIDRES    0.476837 Hz
AQ        1.0488760 sec
RG        191.38
DN         16.000 usec
DE         6.50 usec
TE        299.3 K
D1        2.00000000 sec
D11       0.03000000 sec
TDO       1

===== CHANNEL f1 =====
SFO1     125.7703637 MHz
NUC1      13C
P1        9.80 usec
PLW1     90.00000000 W

===== CHANNEL f2 =====
SFO2     500.1320005 MHz
NUC1      1H
CPDPRG12 waltz16
PCPD2    80.00 usec
PLW2     24.00000000 W
PLW12    0.26015001 W
PLW13    0.23050000 W

F2 - Processing parameters
SI        65536
SF        125.7577888 MHz
WDW       EM
SSB       0
LB        1.00 Hz
  
```

<sup>13</sup>C-NMR of compound 5f

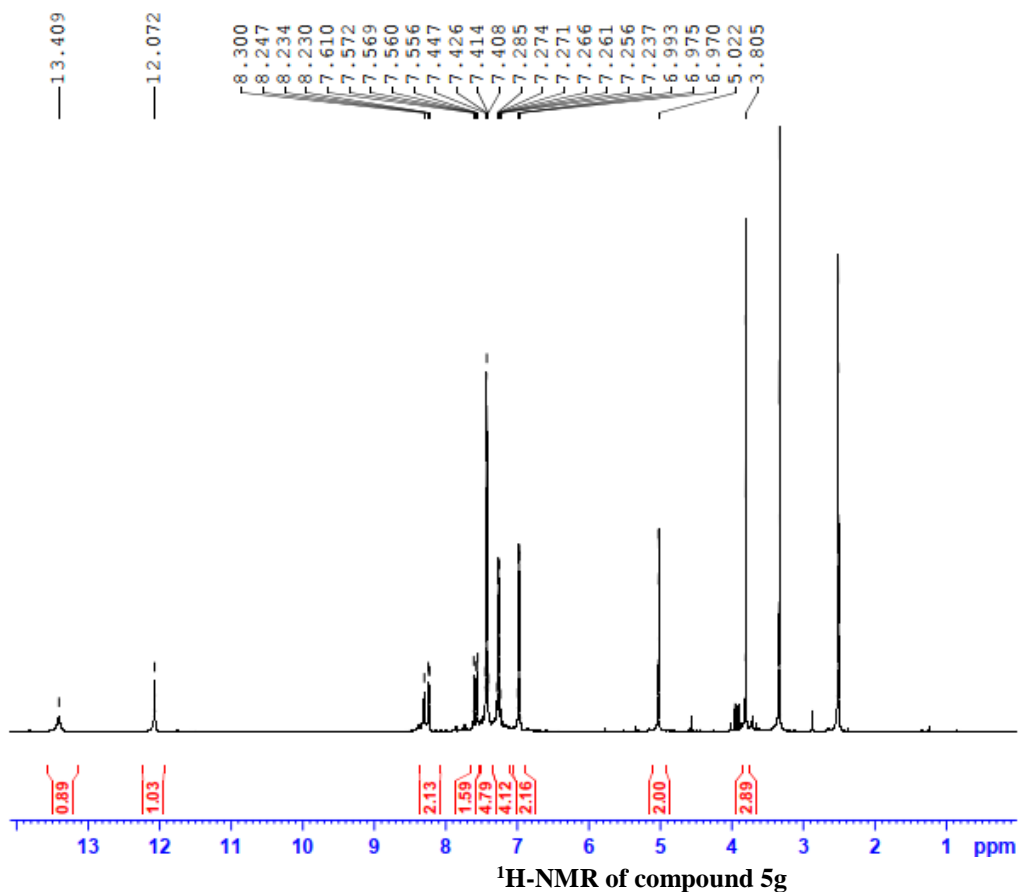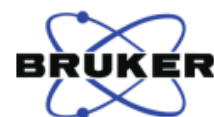

Current Data Parameters  
 NAME Tien Anh-1046  
 EXPNO 40  
 PROCNO 1

FC - Acquisition Parameters:  
 Date\_ 20200118  
 Time 0.38  
 INSTRUM spect  
 PROBHD 5 mm PABBO BB/  
 PULPROG zg30  
 TD 65536  
 SOLVENT DMSO  
 NS 16  
 DS 2  
 SWH 10000.000 Hz  
 FIDRES 0.182388 Hz  
 AQ 3.2767999 sec  
 RG 191.38  
 DW 50.000 usec  
 DE 6.50 usec  
 TE 299.8 K  
 D1 1.00000000 sec  
 TDO 1

===== CHANNEL #1 =====  
 SF01 500.1330885 MHz  
 NUC1 1H  
 P1 9.80 usec  
 PLW1 24.00000000 W

FC - Processing parameters  
 SI 65536  
 SF 500.1300000 MHz  
 WDW EM  
 SSB 0  
 LB 0.30 Hz  
 GB 0  
 PC 1.00

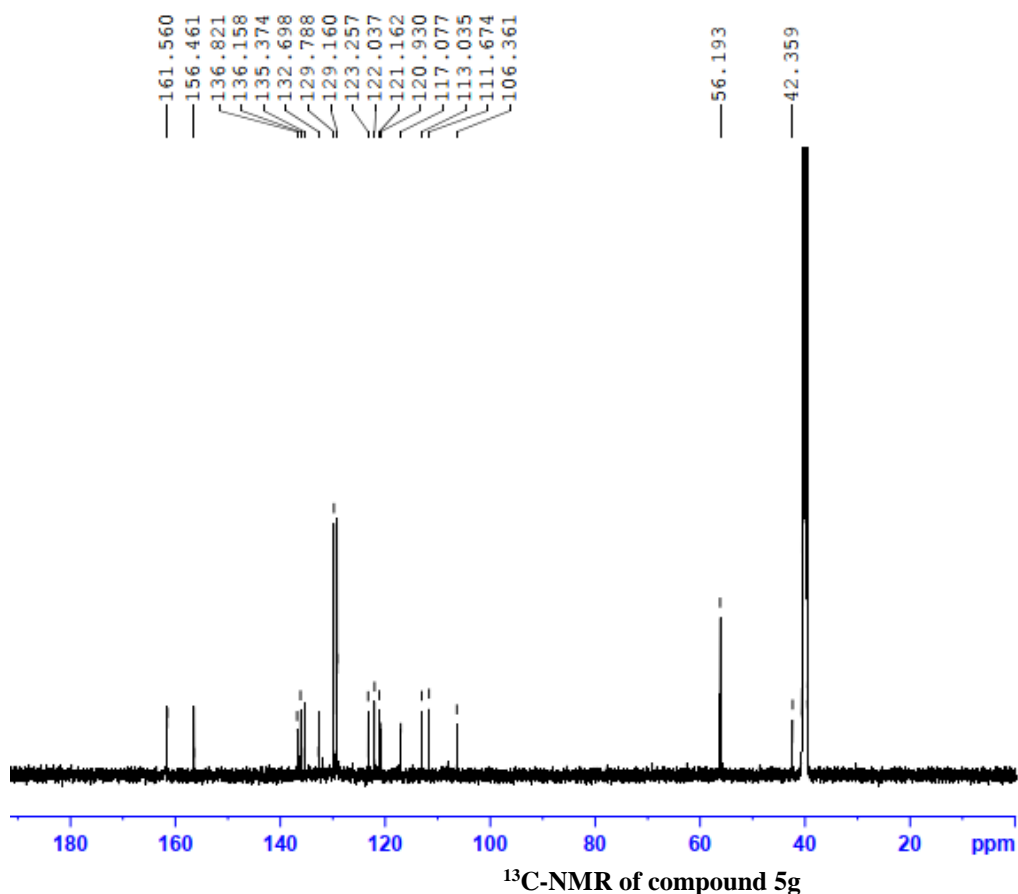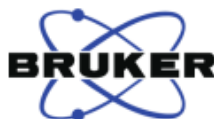

Current Data Parameters  
 NAME Tien Anh-1046  
 EXPNO 41  
 PROCNO 1

FC - Acquisition Parameter:  
 Date\_ 20200118  
 Time 2.26  
 INSTRUM spect  
 PROBHD 5 mm PABBO BB/  
 PULPROG zgpg30  
 TD 65536  
 SOLVENT DMSO  
 NS 2048  
 DS 4  
 SWH 31250.000 Hz  
 FIDRES 0.476837 Hz  
 AQ 1.04885760 sec  
 RG 191.38  
 DW 16.000 usec  
 DE 6.50 usec  
 TE 299.8 K  
 D1 2.00000000 sec  
 D11 0.02000000 sec  
 TDO 1

===== CHANNEL #1 =====  
 SF01 125.7703697 MHz  
 NUC1 13C  
 P1 9.50 usec  
 PLW1 90.00000000 W

===== CHANNEL #2 =====  
 SF02 500.1320005 MHz  
 NUC2 1H  
 CPDPRG12 waltz16  
 PCPD2 80.00 usec  
 PLW2 24.00000000 W  
 PLW12 0.26015001 W  
 PLW13 0.23050000 W

FC - Processing parameters  
 SI 65536  
 SF 125.7577888 MHz  
 WDW EM  
 SSB 0
